1

2

3

## **Covariant Fitness Clusters Reveal Structural Evolution of**

4

## **SARS-CoV-2 Polymerase Across the Human Population**

5

6

Authors: Chao Wang<sup>1\*</sup>, Nadia Elghobashi-Meinhardt<sup>2</sup>, William E. Balch<sup>1\*</sup>

7

8

Affiliations: <sup>1</sup>Department of Molecular Medicine, Scripps Research, La Jolla, California, 92037,

9

USA. <sup>2</sup>Department of Physical and Theoretical Chemistry, Technische Universität Berlin, 10623

10

Berlin, Germany.

11

\*Correspondence: [chaowang@scripps.edu](mailto:chaowang@scripps.edu); [webalch@scripps.edu](mailto:webalch@scripps.edu)

## 1 **Abstract**

2 Understanding the fitness landscape of viral mutations is crucial for uncovering the evolutionary  
3 mechanisms contributing to pandemic behavior. Here, we apply a Gaussian process regression  
4 (GPR) based machine learning approach that generates spatial covariance (SCV) relationships to  
5 construct stability fitness landscapes for the RNA-dependent RNA polymerase (RdRp) of SARS-  
6 CoV-2. GPR generated fitness scores capture on a residue-by-residue basis a covariant fitness  
7 cluster centered at the C487-H642-C645-C646 Zn<sup>2+</sup> binding motif that iteratively evolves since  
8 the early phase pandemic. In the Alpha and Delta variant of concern (VOC), multi-residue SCV  
9 interactions in the NiRAN domain form a second fitness cluster contributing to spread. Strikingly,  
10 a novel third fitness cluster harboring a Delta VOC basal mutation G671S augments RdRp  
11 structural plasticity to potentially promote rapid spread through viral load. GPR principled SCV  
12 provides a generalizable tool to mechanistically understand evolution of viral genomes at atomic  
13 resolution contributing to fitness at the pathogen-host interface.

## 1 Introduction

2           Coronavirus disease 2019 (COVID-19) (1, 2), caused by the severe acute respiratory  
3 syndrome coronavirus 2 (SARS-CoV-2) (3, 4), has resulted in more than 299 million cases and  
4 led to more than 5.4 million deaths globally (5). SARS-CoV-2 is a positive-sense single-stranded  
5 RNA virus with a ~30 kb genome that has an estimated variation rate of  $1.12 \times 10^{-3}$  mutations per  
6 site-year (6). More than 0.15 million unique genetic mutations have been identified for SARS-  
7 CoV-2 based on more than 3.7 million SARS-CoV-2 genome sequences (7-12). Understanding  
8 the structural and functional impact of these mutations and linking this information to their spread  
9 in the human population are crucial in revealing the mechanism of adaptation leading to fitness of  
10 SARS-CoV-2 in the human host environment (13, 14) as well as in guiding the surveillance and  
11 management of the COVID-19 pandemic.

12           Our current understanding of SARS-CoV-2 mutations principally comes from studies on  
13 the spike protein given its central role in mediating the entry into the host cells and serving as the  
14 primary target for neutralizing antibodies (15-17). For example, the D614G mutation in the spike  
15 protein found in dominant lineages has been shown to increase the infection rate and transmission  
16 for SARS-CoV-2 (18-22). Moreover, N501Y, E484K and L452R mapping to the receptor binding  
17 domain of the spike protein and emerging in variants of concern (VOC) (e.g., Alpha (B.1.1.7),  
18 Beta (B.1.351), Gamma (P.1), Delta (B.1.617.2/AY.\*), and Omicron (B.1.1.529)) have drawn  
19 attention due to their potential roles in mediating the host cell receptor binding and/or in enabling  
20 immune escape (16, 17). Besides the spike protein, SARS-CoV-2 encodes ~29 additional proteins  
21 including 16 non-structural proteins (nsp), four structural proteins and other accessory proteins (23,  
22 24). Each protein interacts with a set of host proteins to establish the many aspects of the SARS-

1 CoV-2 life cycle (23, 25). However, beyond the well-studied spike protein, little is known about  
2 the impact of mutations on the function and structure of other SARS-CoV-2 proteins responsible  
3 for VOC linked surges driving the pandemic (15, 26).

4         The replication and transcription of SARS-CoV-2 genome are managed by the viral RNA-  
5 dependent RNA polymerase (RdRp) protein complex, which is comprised of the catalytic subunit  
6 nsp12 and the cofactors nsp7 and nsp8 (27-30). Nsp12 alone has little activity and its binding with  
7 nsp7 and two nsp8 subunits (referred to herein as nsp8-1 and nsp8-2) is necessary for the  
8 polymerase function (27, 31). Nsp12 is the target of Remdesivir, a nucleoside analog that inhibits  
9 RdRp activity through chain termination (28, 32, 33), and more recently, the nucleoside analog  
10 molnupiravir that triggers lethal mutagenesis (34-36). Both are approved by U.S. Food and Drug  
11 Administration (FDA) to treat COVID-19 patients, although clinical trials using a broad population  
12 spanning multiple countries found no significant effect of Remdesivir in preventing disease  
13 progression (44). Characterizing the functional and structural fitness of RdRp mutations during  
14 SARS-CoV-2 transmission in the context of the world population is important for understanding  
15 the physiological mechanisms responsible for its ability to adapt to the human host environment(s).  
16 These mechanisms that potentially impact viral replication and viral load are important for the  
17 development of novel therapeutic strategies to limit viral transmission and pathology.

18         In the evolution of RNA viruses, an increase in mutation frequency can arise from genetic  
19 drift due to random events, or from positive selection according to Darwinian principles (45).  
20 Identifying the corresponding functional and structural selection processes driving fitness in  
21 response to variation is challenging, particularly for those directing complex pathogen-host  
22 relationships (26, 46, 47). Here, we assess the impact of mutations on the structural thermodynamic

1 stability of RdRp through free energy computation reflecting physical-chemical features  
2 contributing to fold function. These values are then linked to virus spread in the human population  
3 using a Gaussian process regression (GPR) based machine learning approach termed variation  
4 spatial profiling (VSP) (48-50). VSP is based on the principle of spatial covariance (SCV) that  
5 connects the sequence and phenotype information of a sparse collection of mutations found in the  
6 population to pinpoint and project the critical residue-residue relationships shaped through  
7 evolution driving function (48). GPR also generates robust uncertainty for each prediction (51-54),  
8 providing a rigorous tool to assess the probability of function of a residue in the context of other  
9 evolving residues in response to the local environment (48).

10         Using GPR, we construct ‘fitness landscapes’ to mechanistically describe the molecular  
11 mechanisms driving fitness of RdRp in 1) the early ‘phase I’ of pandemic before the emergence of  
12 any currently recognized VOC, 2) for ‘opportunistic’ Alpha VOC sequences that dominate the  
13 ‘phase II’ of pandemic, and 3) for ‘predatory’ Delta VOC sequences that dominate the ‘phase III’  
14 of the pandemic (**Fig. 1A**). The ‘GPR-based fitness scores’ generated from fitness landscapes for  
15 every residue in RdRp reveal previously undetected structural ‘covariant fitness clusters’ defined  
16 by their changes in thermodynamic stability and residue connections in driving virus spread during  
17 the pandemic. These covariant fitness clusters involve structure adjustments for Zn<sup>2+</sup> binding,  
18 multi-residue interactions in the N-terminal Nidovirus RdRp associated nucleotidyl transferase  
19 domain (NiRAN) domain, and a covariant fitness cluster harboring G671S, a unique basal  
20 mutation that exists in almost all the Delta VOC sequences. We propose that GPR fitness scores  
21 defined by SCV relationships provide a computational platform to mechanistically assess the role  
22 of natural selection in the rapidly evolving viral lifecycle contributing to the pandemic.

## 1 Results

### 2 Structural impact of RdRp mutations

3 To follow the evolution of nsp12 structure over the time-course of the pandemic, we first  
4 looked at 87,468 SARS-CoV-2 genome sequences from the human host in GISAID database (7,  
5 8) spanning Dec. 24, 2019 (3) to Sept. 08, 2020, prior to emergence of individual VOC (referred  
6 to as the ‘phase I’ of the pandemic) (**Fig. 1A**). Among these collected sequences, 1,569 missense  
7 mutations were identified in nsp12, ~55% of which only appeared in one virus sample each (10).  
8 Subsequently, we used the remaining 699 mutations present in at least two individuals ( $\geq$  two allele  
9 counts) reflecting at least one human-human transmission event for these mutations. We used the  
10 Foldx software that relies on empirically derived energy terms (55, 56) to analyze the impact of  
11 these mutations on structural thermodynamic stability (referred to henceforth as structural  
12 stability), subunit binding, and RNA binding for the RdRp complex structures in different chemical  
13 environments, such as oxidized or reduced states (PDB:6m71 and 7btf) (30), structures without or  
14 with Remdesivir (PDB:7bv1 and 7bv2) (32), structures with the stalled pre- or post- translocated  
15 states (PDB:7c2k and 7bzf) (28), and the structure of nsp12 complexed with full-length nsp7 and  
16 nsp8 (PDB:6yyt) (29) (**Fig. 1B**).

17 Among the 699 mutations with at least two allele counts, 695 mutations are mapped to  
18 residues that have resolved structural information and can be found along the entire structure of  
19 nsp12 (**Fig. 1B**). The impact of these mutations on the overall structural stability ( $\Delta\Delta G$ ) assessed  
20 by Foldx is highly correlated between different structures (**Fig. S1A**; Pearson correlation  
21 coefficient (Pearson’s  $r$ ) = ~0.7-0.8), demonstrating that the Foldx results are robust across  
22 different structural states. We averaged the impact on structural stability in different states for each

1 mutation and classified the mutations using the reported accuracy of Foldx computed  $\Delta\Delta G$   
2 (**Fig. 1C**, see **Methods**) (56, 57). The majority of the mutations (~57%) generated in the phase I  
3 of the pandemic have a neutral or slight impact on RdRp structural stability (-0.92 kcal/mol  
4  $<\Delta\Delta G<0.92$  kcal/mol) (**Fig. 1C**). Of the remaining, a number of mutations have a significant  
5 destabilizing impact (~19% from 0.92 to 1.84 kcal/mol) or highly destabilizing impact (~19% >  
6 1.84 kcal/mol), whereas others have a strong stabilizing impact (~4%  $< -0.92$  kcal/mol) (**Fig. 1C**).  
7 These results indicate that mutations with significant structural impact on the stability of the RdRp  
8 complex were already circulating in the human population during the first nine months of the  
9 COVID-19 pandemic.

10 In the dataset reflecting at least one transmission event (**Fig. 1C**), there is no significant  
11 linear correlation between the  $\Delta\Delta G$  value impacting structural stability and the allele count in  
12 human population (**Fig. S1B**; Pearson's  $r = -0.06$ ,  $p = 0.1$ ). The most frequent mutation is P323L  
13 (allele count 70,102), occurring in ~80% of SARS-CoV-2 genomes uploaded by early September  
14 2020 (**Fig. 1C**). Though the overall structural stability impact of P323L is estimated as neutral  
15 (**Fig. 1C**), when compared to other mutations, P323L significantly stabilizes the binding energy  
16 between nsp12 and nsp8-1 that is critical for RdRp activity (27) (**Fig. 1D**). The second most  
17 frequent RdRp mutation is A97V present in ~2% of SARS-CoV-2 genome samples and has a  
18 significant destabilizing impact on the overall structural stability of RdRp (**Fig. 1C**). This mutation  
19 maps to the NiRAN domain (**Fig. 1E**, residues 1 to 250). The nucleotidyltransferase activity of the  
20 NiRAN domain is essential for viral load and propagation (58, 59), but the target remains unclear  
21 (60). Recent studies showed that the NiRAN domain acts as a guanylyltransferase to catalyze  
22 transcript capping. Its binding to nsp9 inhibits this activity (61, 62). It has also been shown that  
23 the NiRAN domain catalyzes a nucleoside monophosphate transferase reaction on the N-terminus

1 of nsp9 (63). The A97V mutation shows no impact on the binding energy to nsp9 when compared  
2 with P323L, that is not in the NiRAN domain (**Fig. 1E**). However, it shows a significant  
3 destabilizing impact on the binding to GDP or ADP, which is critical for the nucleotidylation  
4 activity of the NiRAN domain (**Fig. 1E**). Besides A97V, ~298 additional mutations significantly  
5 impact the stability of the RdRp structure (**Fig. 1C**).

6         Given the lack of general linear correlation between structural stability and allele frequency  
7 (**Fig. S1B**), we set out to use a novel GPR-based machine learning approach (48) to determine at  
8 residue-by-residue resolution whether there is a hidden pattern of spatial covariant relationships at  
9 the sequence level driving the structural fitness of RdRp during the spread of SARS-CoV-2 in the  
10 human population.

### 11 **Building a GPR fitness landscape based on structural stability of RdRp**

12         We previously showed that a GPR-based variation spatial profilng (VSP) approach (48),  
13 which uses only a sparse collection of variants distributed across the human population to capture  
14 at atomic resolution the SCV relationships linking genotype variation to experimental and clinical  
15 phenotypes, can be used to map protein function on a residue-by-residue basis with defined  
16 uncertainty for the entire sequence to understand human genetic disease (48-50). To explore the  
17 SCV relationships underlying the RdRp mutations that link its sequence and structural features to  
18 spread, quantified as allele count in the human population, we used 63 mutations that have either  
19 significant stabilizing ( $\Delta\Delta G > 0.92$  kcal/mol) or destabilizing ( $\Delta\Delta G < -0.92$  kcal/mol) impact  
20 with  $>10$  allele counts reflecting transmission robustness across the human population. Among the  
21 63 mutations, A97V has an extremely high allele count that is above two standard deviations of  
22 the distribution (**Fig. 2A**). Given that GPR is sensitive to extreme outliers (64-67), we generated



1 two GPR models, one using the 62 mutations within the two standard deviations (**Fig. 2B-E; Fig.**  
2 **S2**) and another using all the 63 mutations including A97V (**Fig. S3**). To incorporate sequence  
3 information in the GPR model, we used the location of each of the mutations by its position on the  
4 primary sequence as the **x-axis** where the full-length sequence of nsp12 is assigned as 1.0 (**Fig.**  
5 **2B**). To include the impact of both the stabilizing (4 mutations) and the destabilizing (59 mutations)  
6 mutations, we used the absolute  $\Delta\Delta G$  as a log transformation ( $\log_{10}(1+|\Delta\Delta G|)$ ) (**y-axis**) (**Fig. 2B**).  
7 A larger value indicates stronger structural impact in response to a larger change in Gibbs free  
8 energy compared to the wild-type (WT) structure. To link the sequence position (**x-axis**) and  
9 structural stability (**y-axis**) to the spread of virus using GPR, we used the allele count found in the  
10 population of each mutation as the **z-axis** value (**Fig. 2B**, color scale).

11 In our GPR-principled approach (48), a ‘molecular variogram’ (**Fig. 2C**) (48, 52) is used  
12 to analyze the relationships that link the distance between pairwise mutations in terms of their  
13 locations in primary sequence (**x-axis**) and thermodynamic structural stability (**y-axis**), to the  
14 spatial variance of the allele count (**z-axis**) (**Fig. 2B**, black lines). The molecular variogram (48,  
15 52) represents a generalized quantitative assessment of how the nsp12 mutations correlate with  
16 each other to drive the viral spread in the context of their sequence position and impact on  
17 structural stability (see **Methods**). The variogram reveals that the spatial variance, defining the  
18 dissimilarity of the allele counts for all pairwise mutations, increases according to the mutations’  
19 distance based on sequence positions in the nsp12 protein (**x-axis**) and the mutations’ structural  
20 stability impact (**y-axis**) until reaching a plateau value (**Fig. 2C**,  $y = 0.11$ ) at a ‘range’ that spans  
21 ~50% of the nsp12 polypeptide (**Fig. 2C**,  $x = 0.49$ ). This result indicates that a fundamental  
22 molecular signature representing a general spatial variance relationship related to structural

1 stability is required to drive the fitness of nsp12 mutations contributing to the spread of SARS-  
2 CoV-2.

3         Based on the molecular variogram generated from nsp12 mutations (**Fig. 2C**), GPR can be  
4 used to generate a structural stability fitness landscape (48) (**Fig. 2D**; see **Methods**), referred to  
5 simply as a ‘fitness landscape’ hereafter. The fitness landscape shows the predicted SCV  
6 relationships linking the structural stability impact based on  $\Delta\Delta G$  to the allele count in human  
7 population for every residue spanning the entire polypeptide of nsp12. We refer to the predicted  
8 allele count value (**z-axis**) in the fitness landscape for each residue in the nsp12 sequence (**x-axis**)  
9 with an assigned structural thermodynamic stability value (**y-axis**) as a ‘GPR fitness score’  
10 (**Fig. 2D**, color scale). A higher GPR fitness score (**Fig. 2D**, yellow-orange-red) indicates an  
11 improved fitness on a residue in the human host population in response to variation when compared  
12 to variation at other residues with lower scores (**Fig. 2D**, green-cyan-blue). The GPR fitness scores  
13 in the landscape for the input mutations are strongly correlated with their actual allele counts  
14 (**Fig. S2A**, Pearson’s  $r = 0.73$ ,  $p = 1.6 \times 10^{-11}$ ), indicating that the comprehensive output fitness  
15 landscape values reliably capture the trend of the actual allele count for the sparse collection of  
16 input mutations. Comparison of the GPR model with other models such as a multivariate linear  
17 model and a decision tree based model (random forest) using leave-one-out cross-validation  
18 showed that GPR achieves the lowest root-mean-square error (**Fig. S2B-F**). Moreover, instead of  
19 generating a single value prediction, GPR assesses the probability distribution based on the spatial  
20 covariant matrix of all data points, and outputs an uncertainty (or confidence) value for each  
21 prediction (see **Methods**) that is plotted as contour lines in the GPR fitness landscape with the top  
22 25% confidence value indicated as a bold contour line (**Fig. 2D**). The top 25% confidence value  
23 assigns value with high confidence to above 95% of the nsp12 residues. The SCV-based

1 uncertainty value allows us to prioritize the predictions for variation found on each residue to  
2 generate residue-by-residue GPR fitness scores (see **Methods**). These residue-by-residue  
3 relationships contributing to the structural fitness of RdRp in SARS-CoV-2 provide a uniform and  
4 quantitative platform to understand the key molecular features responsible for spread in response  
5 to the environment.

## 6 **GPR fitness scores identify a covariant fitness cluster adjusting $Zn^{2+}$ binding in RdRp**

7         The fitness landscape reveals dramatically different GPR fitness scores within and between  
8 different domains (**Fig. 2D**). For example, we observe a major hotspot (**Fig. 2D**, yellow-orange-  
9 red) in the top 25% confidence region (**Fig. 2D**, bold contour line) that spans from the beginning  
10 of the finger domain (residue 366) to the end of palm domain (residue 815) (**Fig. 2D**, see *x*-axis  
11 labeling). To understand the structural details of the fitness hotspot, we mapped the highest  
12 confidence prediction for each residue in the landscape onto the RdRp structure to generate a  
13 'covariant fitness structure' (simply referred to as a 'fitness structure' henceforth) with the color  
14 scale representing the residue-based GPR fitness score (**Fig. 2E**; **Fig. S3D**, see **Methods**) (48-50).  
15 The fitness structure shows that the residues with relatively high GPR fitness scores are centered  
16 at one of the  $Zn^{2+}$  binding motifs (**Fig. 2E**; **Fig. S3D**). Specifically, the C563F, M629I, L636I,  
17 L638F, S647I and A690D mutations that are in the fitness hotspot map to the  $\alpha$ -helices that are  
18 adjacent to the C487-H642-C645-C646  $Zn^{2+}$  binding site (**Fig. 2F**). Among these mutations,  
19 L638F and S647I are at the two ends of a loop which contains H642, C645, and C646 of the  $Zn^{2+}$   
20 binding motif (**Fig. 2F**). Molecular dynamics (MD) simulations (see **Methods**) of L638F and  
21 S647I indicate that these two mutations trigger a more rapid increase of the overall coordination  
22 distances of  $Zn^{2+}$  binding motif than WT (**Fig. 2G**). The disruption of  $Zn^{2+}$  binding by either

1 mutation or redox-switch of the disulfide bonds for cysteine residues in the  $Zn^{2+}$  binding motif  
2 impact the overall conformational dynamics of nsp12, as well as its association with nsp8-1  
3 subunits and RNA substrate (**Fig. S4**). Consistent with the MD simulation results, C563F in the  
4 fitness hotspot near the nsp8-1 binding site shows a significantly destabilizing impact for the  
5 binding between the nsp12 and nsp8-1 subunits (**Fig. S2G**), while A690D shows a significantly  
6 destabilizing impact for the RNA binding (**Fig. S2H**). These results indicate that SCV relationships  
7 connect the  $Zn^{2+}$  binding motif to the nsp12 binding sites for nsp8-1 and the RNA substrate (**Fig.**  
8 **2E**). We posit that the residue-residue SCV relationships connecting these structural features  
9 generate a ‘covariant fitness cluster’ in the fold (**Fig. 2D** and **2E**). This covariant fitness cluster  
10 (referred as cluster 1) has significant impact on the structural stability as it consists of a cluster  
11 mutations with absolute  $\Delta\Delta G$  values above 0.92 kcal/mol (**Fig. 2D**). Furthermore, the residues in  
12 the covariant cluster 1 have high confidence GPR fitness scores that are above the mean of input  
13 allele count (**Fig. 2D** and **E**; yellow-orange-red with z-value  $>1.55$  (~35 allele count)). Therefore,  
14 the SCV relationships in covariant fitness cluster 1 represent critical RdRp residue-residue  
15 structural features that evolve to augment SARS-CoV-2 fitness in the population.

16 Tracking the cumulative allele counts of the mutations in the covariant fitness cluster over  
17 time reveals that the allele counts of the mutations that are closest to the  $Zn^{2+}$  binding site, L638F  
18 and S647I, increase more rapidly than other mutations (**Fig. 2H**), suggesting the key roles of the  
19  $Zn^{2+}$  binding motif in defining the evolving covariant fitness cluster 1. Interestingly, the two  
20 mutations have different time-sensitive country specific trajectories (**Fig. 2H**). For example, in  
21 early Sept. 2020, L638F was mainly found in South Korea and Australia, while S647I was mainly  
22 found in UK, Germany, and Denmark (**Fig. 2H**). These results demonstrate that a covariant fitness  
23 cluster 1 determined by the GPR fitness score represents a common feature in RdRp that SARS-

1 CoV-2 can evolve separately in different countries reflecting the importance of SCV in evolution  
2 of the pandemic.

### 3 **N-terminal NiRAN domain fitness cluster in the Alpha VOC**

4 The emergence of the prominent ‘opportunistic’ Alpha VOC from late 2020 (~1% daily  
5 prevalence on Nov 11, 2020) to the early 2021 (~68% daily prevalence on Mar 29, 2021) time-  
6 frame of the pandemic (**Fig. 3A**, phase II) prompted us to investigate specifically how the RdRp  
7 structure evolves in the Alpha VOC (68, 69). For this purpose, we collected 950 missense  
8 mutations in nsp12 from all the submitted Alpha VOC sequences up to Mar 29, 2021 (169,941  
9 sequences, see **Methods**) and analyzed the structural impact of 615 mutations on nsp12 that have  
10 at least two allele counts in the Alpha VOC sequences (**Fig. 3B**). P323L, the most frequent  
11 mutation in nsp12 in the first nine months of the pandemic (**Fig. 1C**), exists in almost all the Alpha  
12 VOC sequences (**Fig. 3B**, ~100%). Therefore, we define this mutation as a basal mutation for the  
13 Alpha VOC, highlighting the importance of stabilizing nsp12 and nsp8-1 binding (**Fig. 1D**) to  
14 promote the prevalence of the Alpha VOC. The second most frequent mutation of nsp12 in the  
15 evolution of the Alpha VOC lineage in phase II is P227L that is found in ~5.5% of Alpha VOC  
16 sequences (**Fig. 3B**). This mutation has a slightly destabilizing structural impact  
17 ( $0.46 \text{ kcal/mol} < \Delta\Delta G < 0.92 \text{ kcal/mol}$ ) (**Fig. 3B**) and maps to the NiRAN domain at the interface  
18 between nsp12 and nsp9 (**Fig. S5A**). When compared with A97V found in the NiRAN domain,  
19 P227L does not impact the GDP binding but significantly destabilizes the interaction to nsp9 that  
20 has been shown to be an inhibitor to the nucleotidylatation activity of NiRAN domain (**Fig. S5B**).

21 To understand how all of the emergent nsp12 mutations with significant impact on  
22 thermodynamic stability drive the fitness of RdRp in the Alpha VOC, we generated the GPR-based

1 fitness landscape and the corresponding fitness structure of RdRp for the Alpha VOC (**Fig. 3C-D;**  
2 **Fig. S5D-H**). The covariant fitness cluster surrounding the C487-H642-C645-C646 Zn<sup>2+</sup> binding  
3 motif observed in the phase I landscape (**Fig. 2D-E**) recurs in the fitness landscape and fitness  
4 structure in the Alpha VOC (**Fig. 3C-D**, cluster '1'). This result illustrates that the structural and  
5 functional features associated with the C487-H642-C645-C646 Zn<sup>2+</sup> binding motif are key  
6 elements that SARS-CoV-2 iteratively evolves to adapt to human host environment to promote  
7 fitness feature contributing to the pandemic. Intriguingly, we observe the emergence of a new and  
8 strong covariant fitness cluster within the NiRAN domain we now refer to as covariant cluster 2  
9 (**Fig. 3C-D**, cluster '2') when compared with the phase I landscape prior to the emergence of the  
10 VOC (**Fig. 2D-E; Fig. S3C-D**). Given that the new covariant fitness cluster in the NiRAN domain  
11 has a significant impact on structural stability resulting in high GPR fitness scores (**Fig. 3C-D**),  
12 SCV relationships highlight an important role of the NiRAN domain in the evolution of RdRp in  
13 the Alpha VOC in the phase II of the pandemic (**Fig. 3A**).

14 In the nsp12 fitness structure of the Alpha VOC (**Fig. 3D**), residues in an alpha helix  
15 connecting covariant fitness clusters 1 and 2 have high predicted GPR fitness scores (**Fig. 3D**,  
16 magenta dashed circle) supported by mutations D738G and E744D (**Fig. 3C-D**, magenta arrows).  
17 These results show that there are evolving structural relationships that communicate the fitness  
18 cluster of the Zn<sup>2+</sup> binding motif to the NiRAN domain. Consistent with this observation, the  
19 RMSD values of the NiRAN domain in MD simulations show that S647I (**Fig. 3E**, green line,  
20 3.29Å) and L638F (**Fig. 3E**, red line, 3.71Å) found in Alpha VOC are larger than that of WT (**Fig.**  
21 **3E**, purple line, 2.81 Å), indicating that mutations in the fitness cluster of Zn<sup>2+</sup> binding motif (**Fig.**  
22 **3D**, cluster 1) increase the structural plasticity of the NiRAN domain (**Fig. 3D**, cluster 2) and hence  
23 could impact the activity of the NiRAN domain to facilitate improved fitness across the population.

1 Though most of the mutations in covariant fitness clusters 1 and 2 reflect spread in the UK given  
2 the sequences dominating the database (**Fig. 3F-G**), additional mutations evolved in other  
3 countries. For example, A97V remains enriched in the US lineage, A625T notably predominates  
4 in Denmark, G108S evolved in Canada, and L90I is mainly restricted to Ireland (**Fig. 3G**). From  
5 a SCV perspective, these results demonstrate that unique and/or additional mutations can evolve  
6 independently in different geographical locations to facilitate the sequence based function-  
7 structure relationships dominated by the common GPR-based covariant fitness clusters.

### 8 **Delta VOC evolves a novel covariant fitness cluster 3 driven by G671S**

9 First identified in India, the Delta VOC comprising B.1.617.2 (and AY.\*) lineages spread  
10 rapidly across the globe beginning in April 2021 (**Fig. 4A**, ~1% daily prevalence at Apr. 01, 2021)  
11 to become the dominant SARS-CoV-2 strain worldwide by August 2021 with >50% of daily  
12 sequenced SARS-CoV-2 genomes with nearly 100% prevalence in some countries (**Fig. 4A**, phase  
13 III) (70). The relative viral loads in Delta VOC cases have been shown to be higher than those in  
14 people infected with original SARS-CoV-2 strain and Alpha VOC (71-74), suggesting a faster  
15 replication cycle leading to a higher viral load in the Delta VOC.

16 To understand the evolutionary mechanism of RdRp driving Delta VOC's 'predatory  
17 behavior' in the phase III pandemic, differing from the opportunistic Alpha VOC in the phase II  
18 pandemic (**Fig. 4A**), 1,073 missense nsp12 mutations were collected from 146,651 genome  
19 sequences for the Delta VOC lineages consisting of B.1.617.2, AY.1, AY.2, AY.3, and AY.3.1 up  
20 to August 01, 2021 (**Fig. 4A**) (see **Methods**) (11, 12). We analyzed the structural stability impact  
21 of 681 missense mutations on nsp12 that have at least two allele counts in the Delta VOC (**Fig. 4B**).  
22 Almost all the Delta VOC sequences (>99.9%) contain the basal P323L mutation found in the

1 Alpha VOC. However, distinct from the Alpha VOC in which P323L is the only nsp12 basal  
2 mutation, G671S exists in >98.7% Delta VOC sequences (**Fig. 4B**), thus becoming an additional  
3 new basal mutation. The averaged  $\Delta\Delta G$  of G671S is above 0.92 kcal/mol (**Fig. 4B**), indicating it  
4 has a significantly destabilizing effect on RdRp structure that could impact its replicative capacity.  
5 This new basal mutation in Delta VOC was found in the mutation pool of both phase I fitness  
6 landscapes (**Fig. 2D-E**) and in phase II Alpha VOC landscapes (**Fig. 3C-D**) with a high GPR  
7 fitness score at the edge of the C487-H642-C645-C646 Zn<sup>2+</sup> covariant fitness cluster 1. Thus, GPR  
8 analysis indicates that the destabilizing mutation G671S has been repeatedly selected in different  
9 lineages. Integration of G671S as a basal mutation in the Delta VOC provides a unique  
10 foundational genetic framework for the evolution of RdRp activity.

11 In addition to the appearance of basal mutations P323L and G671S (**Fig. 4B**), the latter  
12 serving as a unique feature in nsp12 for the Delta VOC when compared with the Alpha VOC, we  
13 found that the allele count of the neutral mutations in 169,941 Alpha VOC sequences is not  
14 significantly different from that in the 146,651 Delta VOC sequences (**Fig. 4C**). In contrast, the  
15 allele count of the mutations with impact on structural stability defined by  $\Delta\Delta G > 0.92$  or  $\Delta\Delta G <$   
16  $0.92$  is significantly higher than that in the Alpha VOC (**Fig. 4D**), suggesting RdRp undergoes  
17 larger structure remodeling in the Delta VOC. Consistent with this observation, the fitness  
18 landscape of the emergent Delta VOC in phase III (**Fig. 4E** and **Fig. S6A-B**) reveals a larger area  
19 with higher GPR fitness scores when compared with the phase I landscape (**Fig. 2D**; **Fig. S3C**)  
20 and Alpha VOC (**Fig. 3C** and **Fig. S5G**). Mapping the high confidence predictions of each residue  
21 onto the nsp12 structure reveals that the previously identified covariant fitness cluster 1 and 2 recur  
22 in the Delta VOC (**Fig. 4F-G**). Strikingly, we observe a new fitness cluster (referred to as cluster  
23 3) around the unique basal mutation G671S in the Delta VOC (**Fig. 4F-G**). These results raise the



1 possibility that the structural remodeling of the region around G671S contributes to the unique  
2 predatory behavior of the Delta VOC in driving the pandemic, likely through increased viral load  
3 (71-74).

#### 4 **Clusters 1-3 collectively contribute to Delta VOC predatory behavior**

5 To reveal the overall protein design of nsp12 that is responsible for the evolving predatory  
6 behavior of Delta VOC driving the pandemic, we examined the collective impact of residues with  
7 high GPR fitness scores on the different covariant fitness clusters 1-3 (**Fig. 4G**). Covariant fitness  
8 cluster 1 (**Fig. 5A-C**) includes the C487-H642-C645-C646 Zn<sup>2+</sup> binding motif that we have  
9 captured from the beginning of the pandemic (**Fig. 2D-E**), in phase II Alpha VOC (**Fig. 3C-D**)  
10 and in phase III Delta VOC (**Fig. 5A**). These results validate the key importance of this region in  
11 the evolution of RdRp functional-structure design throughout the pandemic. We also observed the  
12 high GPR fitness scores for the residues that connect the Zn<sup>2+</sup> binding motif to the NiRAN domain  
13 (**Fig. 5A**), illustrating evolving connectivity between these two important structural regions in both  
14 Alpha (**Fig. 3C-D**) and Delta VOC (**Fig. 5A**). Moreover, both the Alpha VOC (**Fig. 3C-D**) and  
15 Delta VOC contain a NiRAN covariant fitness cluster 2 (**Fig. 5D-F**). The interacting residues in  
16 the NiRAN domain that are evolving in the Delta VOC sequences (**Fig. 5D**) highlight the  
17 importance of this region to adapt and potentially improve function in response to the host.  
18 Covariant cluster 3 includes the basal state G671S mutation. Interestingly, A400S that interacts  
19 with G671S also shows a high fitness score (**Fig. 5G-H**, 6.2 Å between C<sub>α</sub> atoms). This result  
20 suggests that acquisition of the basal sequence variant G671S in the Delta VOC sequence promotes  
21 the structural evolution of surrounding residues driving functional-structural fitness. Consistent  
22 with this observation, many residues at the interface between nsp12 and nsp8-1/nsp7 have high

1 predicted GPR fitness scores, including the interacting residue pair, S384P and M380I (**Fig. 5G-**  
2 **H**, 6.0 Å between C<sub>α</sub> atoms). These mutations either have lower allele counts or are absent during  
3 the transmission of the Alpha VOC sequences (**Fig. 5J-L**), resulting in significantly lower GPR  
4 fitness scores for the residues of covariant cluster 3 in the Alpha VOC when compared to the Delta  
5 VOC (**Fig. 5L**). These analyses demonstrate for the first time that the unique basal mutation G671S  
6 in the Delta VOC imposes a currently underappreciated level of evolutionary pressure driving the  
7 structural remodeling of its local environment, likely contributing to an elevated replication rate  
8 and to the increased viral load characteristic of Delta VOC (71-74).

## 9 **Discussion**

10 Understanding the process of natural selection in response to variation responsible for the  
11 behavior of a viral lineage driving pathogen-host balance is challenging because 1) the impact of  
12 the vast majority of mutations produced during the virus life cycle appear to be neutral and 2) the  
13 changes of allele frequency due to genetic drift, biased sequence sampling, and/or a multitude of  
14 environmental events are difficult to calibrate (26, 46, 47). A commonly used method to assess the  
15 selection process measures the ratio of the non-synonymous substitutions per non-synonymous  
16 site (dN) to the synonymous substitutions per synonymous site (dS) on each codon (dN/dS) (26,  
17 75). However, this method cannot distinguish the impact of different amino acid residues (i.e., all  
18 possible amino acid changes are treated the same as non-synonymous substitutions) (76) and hence  
19 does not directly report specific functional and coupled functional-structural features of the fold  
20 that drive fitness in the population.

21 Herein, we provide a method to connect mutations to inform and project the evolving  
22 sequence to functional-structural features of the fold that are important for understanding virus

1 fitness in pathogen-host relationships. The rationale for using GPR for assessing selection is that  
2 if a functional feature (or a set of functional features) is being selected in the pathogen-host  
3 relationship, usually a cluster of mutations with similar phenotypes evolves to adjust these  
4 structural and functional features to optimize virus adaptation. The clustering effect can be  
5 quantitatively framed using GPR through the principle of SCV to map with defined uncertainty  
6 critical residue-residue relationships that are shaped through evolution to drive fitness (48).

7 *In silico* assessment of free energy features contributing to structural stability provides one  
8 example that allows us to link the impact of viral sequence variation to the allele frequency (spread)  
9 in human population to understand fundamental functional-structural spatial relationships  
10 directing evolution on a residue-by-residue basis. For example, we observed the recurrence of  
11 C487-H642-C645-C646 Zn<sup>2+</sup> binding motif as covariant fitness cluster 1 in the landscapes or  
12 structures at different time scales and across different lineages. The level of recombination events  
13 of SARS-CoV-2 during human transmission is low (77-79); for example, only 16 recombinant  
14 sequences were identified in 279,000 SARS-CoV-2 sequences from the UK dataset (79). Therefore,  
15 the recurrence of covariant fitness cluster 1 is unlikely due to the recombination with the earlier  
16 sequences; rather, the recurrence is more plausibly a result of evolutionary events that optimize  
17 SCV relationships dictating functional-structural advantage. Indeed, Zn<sup>2+</sup> homeostasis in the  
18 human host has been found critical for immune responses (80), anti-viral activity (81), regulating  
19 RdRp activity (82), viral expansion (83), and the severity of disease in COVID-19 patients (83-  
20 85). A recent study demonstrated that the Zn<sup>2+</sup> binding motifs in SARS-CoV-2 RdRp can also bind  
21 iron-sulfur metal cofactors instead of Zn<sup>2+</sup> (86). The Fe-S bound nsp12 has a much higher specific  
22 activity than the Zn<sup>2+</sup> bound form (86), suggesting that the mutations with high GPR fitness scores  
23 surrounding the Zn<sup>2+</sup> binding site could selectively evolve RdRp activity through the plasticity of

1 these interactions. Moreover, the RNA polymerase activity of SARS-CoV-2 RdRp is nearly  
2 abolished by C487S-C645S-C646S mutations but not by C301S-C306S-310S mutations (86),  
3 consistent with our observation that covariant fitness cluster 1 is centered at C487-H642-C645-  
4 C646 Zn<sup>2+</sup> binding motif and not at the other Zn<sup>2+</sup> binding motif. These results suggest that the  
5 RdRp activity is allosterically managed by residue-to-residue contacts in covariant fitness cluster  
6 1. Therefore, the efficacy of the current clinically promising RdRp nucleoside analogues targeting  
7 the active site, such as remdesivir (32, 33), favipiravir (87), and molnupiravir (41), could also be  
8 allosterically impacted by variations in covariant fitness cluster 1. More specific inhibitors could  
9 be designed to tailor the local residue-residue SCV relationships in the covariant fitness cluster 1  
10 that are critical for the catalytic activity driving SARS-CoV-2 fitness (48, 88).

11 A marked difference observed in the GPR-based fitness landscape and its corresponding  
12 fitness structure for the phase I sequences compared to the Alpha VOC sequences is associated  
13 with the acquisition of destabilizing mutations in covariant fitness cluster 2 housing the NiRAN  
14 domain. The change of SCV relationships in the NiRAN domain suggest that the observed  
15 increased transmission rate of 40-50% for Alpha VOC over precursor lineages in the early phase I  
16 (69) with its unique genetic background (89) required a boost in the NiRAN activity. This  
17 interpretation is consistent with the fact that the emergence of Alpha VOC lineage during chronic  
18 infection (90) set the stage for development of covariant fitness cluster 2. Cluster 2 recurs in the  
19 Delta VOC, demonstrating that the variations in the NiRAN domain may also be important in  
20 driving the fitness of the Delta VOC (60). Besides roles in transcript capping function (61),  
21 nucleotidyltransferase activity on nsp9 (63), and/or kinase like activity (91), the NiRAN domain  
22 can bind to the N-terminal exoribonuclease (ExoN) domain of nsp14, mediating the dimerization  
23 of the replication-transcription complex (62). The potential multifunctional role(s) of the NiRAN

1 domain that is evolving structurally during human transmission suggests that it could be a  
2 promising new drug target (91) that can be mined systematically using a GPR-based SCV platform  
3 from both *in silico* and high throughput screening (HTS) strategies to precisely target its function  
4 (48, 88).

5 Strikingly, the RdRp in the Delta VOC undergoes more significant structural changes when  
6 compared with the opportunistic Alpha VOC over the course of the pandemic, suggesting a rapidly  
7 evolving predatory behavior. One possibility is that plasticity in RdRp of the Delta VOC is due to  
8 the presence of the destabilizing basal mutation G671S found in >98.7% of the VOC sequences.  
9 Indeed, high GPR fitness scores are observed for the sequence and structural regions surrounding  
10 G671S that contribute to the binding interface between nsp12 and nsp8-1 subunits and that result  
11 in the new covariance fitness cluster 3. This newly evolved specialized structural pattern in the  
12 Delta VOC is consistent with an increase of viral load when compared with the population infected  
13 by the original strain identified in Wuhan and the Alpha VOC (71-74). Moreover, the structural  
14 evolution of RdRp in the Delta VOC is not restricted to the binding interface between nsp12 and  
15 nsp8-1 harboring G671S but influences multiple fitness clusters in the nsp12 structure (**Fig. 5**),  
16 suggesting a potential global structural impact of G671S. The recent Omicron VOC harboring a  
17 distinct genetic background with >30 basal mutations on the spike protein that convey novel  
18 immune evasion features (92-96) rapidly became the dominant SARS-CoV-2 strain worldwide by  
19 the beginning of 2022. Early studies show that Omicron is associated with a reduced risk of  
20 COVID-19 hospitalization when compared to Delta (97, 98). Like Delta, the Omicron VOC has  
21 P323L as the nsp12 basal mutation; unlike Delta, it is missing the G671S basal mutation. We posit  
22 that the absence of the G671S basal mutation could be one of the reasons for the attenuated  
23 pathology. In summary, our GPR approach suggests that computational and experimental

1 surveillance of multiple SCV-based functional-structure relationships of the RdRp will be  
2 necessary to track and forecast key events that catalyze the evolving path of SARS-CoV-2  
3 pathology.

4         Given the universality of our SCV-principled approach to explore the path and  
5 consequences of natural selection leading to fitness in the population in rare disease (48-50, 88,  
6 99, 100), GPR can be applied to analyze the impact of variation in other components critical for  
7 the viral lifecycle from both basic and therapeutic perspectives (88). We focused on the  
8 fundamental thermodynamic contributions of amino acids to develop a mechanistic understanding  
9 of the SCV relationships driving the different phases of the world-wide pandemic by the Alpha  
10 and Delta VOC. Incorporation of experimental measurements developed in cell models or use of  
11 clinical data from sequenced COVID-19 patients could be a future direction to define SCV  
12 relationships impacting key physiological features contributing to pathology. Clinical input would  
13 allow us to leverage real-world, evolutionary diverse environments underpinning the design of  
14 SCV-based covariant fitness clusters to understand and therapeutically manage host-pathogen  
15 relationships, analogous to the approach we have shown for rare disease (48-50, 88, 99, 100).

16

## 1 **Methods**

### 2 **Nsp12 mutation datasets**

3 All nsp12 mutations in SARS-CoV-2 sequences collected from Dec.24, 2019 to Sept.08,  
4 2020 for the early phase I study were obtained from CoV-GLUE database ([http://cov-  
5 glue.cvr.gla.ac.uk/](http://cov-glue.cvr.gla.ac.uk/)) (10) which annotates the mutation information of SARS-CoV-2 sequences  
6 from global initiative on sharing all influenza data (GISAID) database (7, 8). We used the database  
7 that was last updated on Sept.08, 2020 that included 87,468 SARS-CoV-2 sequences that passed  
8 the exclusion criteria (>29,000 nucleotides, human host, covering >95% of coding region (10))  
9 from 95526 sequences in GISAID. The collected sequences in this phase do not contain any Alpha  
10 VOC and Delta VOC sequences as the earliest submitted date for high quality Alpha VOC  
11 sequence was in Oct. 2020 and the earliest submitted date for high quality Delta VOC sequence  
12 was in Feb. 2021. Only missense mutations are considered in this study. The mutation information  
13 for the continuous tracking study from Mar.01, 2020 to Jan.15, 2021 (**Fig. 2H** and **Fig. S3G**) was  
14 also obtained from CoV-GLUE database.

15 The information for nsp12 mutations in the Alpha VOC comprising B.1.1.7 lineage of  
16 SARS-CoV-2 was obtained from the 2019 Novel Coronavirus Resource (2019nCoV) at the  
17 China National Center for Bioinformatics (<https://ngdc.cncb.ac.cn/ncov/?lang=en>) (9, 11, 12).  
18 2019nCoV database integrates SARS-CoV-2 sequences from GISAID, National Center for  
19 Biotechnology Information (NCBI), National Microbiology Data Center (NMDC) and China  
20 National Center for Bioinformation (CNCB)/National Genomics Data Center (NGDC). As of the  
21 last update on Mar.29, 2021, 242,989 SARS-CoV-2 sequences were annotated as B.1.1.7 lineage  
22 by using PANGO nomenclature (101). Among these sequences, 169,941 SARS-CoV-2 sequences

1 are complete and in high quality based on the criteria of level of unknown bases, degenerate bases,  
2 gaps, mutation density and so on (9, 11, 12). Missense mutations on nsp12 were obtained from  
3 these high quality sequences through the gff3 files provided by 2019nCoV database.

4 The information for nsp12 mutations in the Delta VOC was obtained from 2019nCoV  
5 database. 146, 651 SARS-CoV-2 sequences of B.1.617.2, AY.1, AY.2, AY.3 and AY.3.1 lineages  
6 with high sequencing quality annotated till August 01, 2021, are used to identify the missense  
7 mutations for nsp12 in Delta VOC. The nomenclature for Delta VOC used was before the changes  
8 on the nomenclature of the AY lineage series (<https://www.pango.network/new-ay-lineages/>).

### 9 **Calculation of structural impact of mutations with FoldX**

10 The calculation of the free energy on RdRp structures for nsp12 mutations was performed  
11 by using FoldX 5.0 (55). Foldx has been widely used for assessing structural stability impacted by  
12 genetic mutations (102-106). The prediction results were found to be in good correlation with the  
13 *in vitro* experimental stability measurements (104, 107, 108) and have been shown to outperform  
14 the results generated by other computational stability predictors to identify disease mutations (109).

15 To generate a robust assessment of the structural impact of nsp12 mutations, 7 RdRp  
16 structures (PDB: 6m71, 7btf, 7bv1, 7bv2, 7c2k, 7bzf and 6yyt) were used for the analysis. The  
17 structure of 7c2k has the most complete residue information on nsp12 with only residue 908 and  
18 909 missing. It was used as the template to fill in the missing residues in other structures by using  
19 Pymol software. The “RepairPDB” function in FoldX 5.0 was first used to correct bad torsional  
20 angles, van der Waals clashes and residues with bad energies for each structure. Then the  
21 “BuildModel” function was used to generate structural model for each mutation. This process was



1 performed in five replicates for each mutation. The change in structural thermodynamic stability  
2 resulting from the mutation was calculated as  $\Delta\Delta G$  (kcal/mol) =  $\Delta G_{\text{mutant}} - \Delta G_{\text{WT}}$  and reported as  
3 a mean  $\pm$  SD over the five model pairs. The previously reported standard deviation (0.46 kcal/mol)  
4 (56) of the difference between FoldX generated  $\Delta\Delta G$  values on structural stability and  
5 experimental measured values was used to bin the mutations into seven categories: neutral (-0.46  
6 kcal/mol  $<\Delta\Delta G < 0.46$  kcal/mol), slightly stabilizing (-0.92 kcal/mol  $<\Delta\Delta G < -0.46$  kcal/mol),  
7 slightly destabilizing (0.46 kcal/mol  $<\Delta\Delta G < 0.92$  kcal/mol), stabilizing (-1.84 kcal/mol  $<\Delta\Delta G < -$   
8 0.92 kcal/mol), destabilizing (0.92 kcal/mol  $<\Delta\Delta G < 1.84$  kcal/mol), highly stabilizing ( $\Delta\Delta G < -$   
9 1.84 kcal/mol) and highly destabilizing ( $\Delta\Delta G > 1.84$  kcal/mol)(106). The “AnalyseComplex”  
10 function was used to assess the impact of mutation on the binding energy between nsp12 and other  
11 subunits or RNA. The change in binding energy resulting from the mutation was calculated as  
12  $\Delta\Delta G$  (kcal/mol) =  $\Delta G_{\text{mutant}} - \Delta G_{\text{WT}}$  and reported as a mean  $\pm$  SD over the five model pairs. The  
13 more recent RdRp structures (PDB: 7cyq and 6xez) were used to assess the mutation impact on  
14 the binding energy to ADP (6xez) or GDP (7cyq) in the NiRAN domain and the binding energy to  
15 nsp9 (7cyq).

## 16 **Molecular dynamic simulations**

17 *Construction of the model.* The RdRp wild-type (WT) nsp12/nps8/nps7 protein complex  
18 was modeled according to the following steps. The initial protein atomic coordinates were taken  
19 from the cryo-EM PDB structure 7BTF.pdb (2.9 Å) (30). Missing internal residues in nsp12 (897-  
20 942) and residues 69-83 in nsp7 were reconstructed using the atomic coordinates from 6YYT.pdb  
21 (29) by overlapping the two structures using the Matchmaker tool in Chimera (110). The protein  
22 mutations S647I and L638F were constructed using the WT structure and mutating the residues

1 S647 and L638, respectively, with CHARMM to replace the atomic coordinates of the side chains.  
2 While keeping all other atoms fixed, the geometry of the side chain atoms of the mutated structure  
3 was then optimized with 500 steps of steepest descent (SD) energy minimization, followed by  
4 1000 adopted basis Newton-Raphson (ABNR). To model WT under oxidizing conditions,  
5 CHARMM was used to introduce the two disulfide bonds, between Cys301-Cys306 and between  
6 Cys487-C645 (111).

7 To determine an initial protonation pattern in nsp12/nsp7/nsp8, pKa values of all titratable  
8 residues were evaluated with electrostatic energy computations using in-house software karlsberg+  
9 (112). This procedure combines continuum electrostatics with structural relaxation of hydrogen  
10 atoms and salt bridges. Assuming a pH of 7, His309, His642, and His295 were protonated on Ne.  
11 Under reducing conditions, the following Cys residues are assumed to be deprotonated: Cys301,  
12 Cys306, Cys487, Cys645. Under oxidizing conditions, disulfide bonds are modeled between  
13 Cys301-Cys306 and between Cys487-C645, and Cys646 and Cys310 are deprotonated. All other  
14 amino acids were protonated according to standard protonation patterns using the H-build tool  
15 from CHARMM (111).

16 ***Geometry optimizations and molecular dynamics.*** The initial geometry of each RdRp  
17 complex was solvated using the CHARMM-GUI in a water box of 90,229 explicit TIP3 water  
18 molecules, with 338 Cl<sup>-</sup> and 353 Na<sup>+</sup> ions to neutralized charge. The total had a total size of  
19 290,155 atoms and was simulated in a square box of dimension 145 Å x 145 Å x 145 Å.

20 The solvated protein complex was next energy minimized with 10,000 steps of conjugate  
21 gradient energy minimization steps to remove any close contacts. All energy minimizations and  
22 geometry optimizations used the all-atom CHARMM36 parameter set for the protein, Cl<sup>-</sup> and Na<sup>+</sup>

1 ions and the TIP3P model for water molecules (113). Van der Waals parameters for the  $Zn^{2+}$  ions  
2 were taken from the CHARMM22 parameter set, which demonstrate better agreement with  
3 experimental radial distribution functions than do the newer  $Zn^{2+}$  parameters published by Stote  
4 and Karplus (114).

5 After 250 ps of equilibration, the solvated protein-membrane complex was simulated with  
6 Langevin molecular dynamics (MD) at 310.15 K for 200 ns with an integration time step of 2 fs  
7 and damping coefficient of 1 ps<sup>-1</sup>. To simulate a continuous system, periodic boundary conditions  
8 were applied. Electrostatic interactions were summed with the Particle Mesh Ewald method (115)  
9 (grid spacing  $\sim 1$  Å; fftx 150, ffty 150, fftz 150). A nonbonded cutoff of 12.0 Å was used, and  
10 Heuristic testing was performed at each energy call to evaluate whether the non-bonded pair list  
11 should be updated.

## 12 **Building fitness landscapes and fitness structures using GPR based VSP.**

13 The VSP analysis of nsp12 mutations was performed as previously described(48-50) using  
14 gstat package (V2.0) in R. VSP is built on Gaussian process regression (GPR) based machine  
15 learning. A special form of GPR machine learning that has been developed in geostatistics,  
16 Ordinary Kriging (52), is used to model the spatial dependency as a variogram to interpolate the  
17 unmeasured value to construct the fitness landscape.

18 *Variogram analysis.* Nsp12 mutations were positioned by their sequence positions in the  
19 polypeptide chain on the 'x' axis coordinate and their impact on structural stability on the 'y' axis  
20 coordinate to the allele count along the 'z' axis coordinate. Suppose the  $i^{\text{th}}$  (or  $j^{\text{th}}$ ) observation in a

1 dataset consists of a value  $z_i$  (or  $z_j$ ) at coordinates  $x_i$  (or  $x_j$ ) and  $y_i$  (or  $y_j$ ). The distance  $h$  between  
2 the  $i^{\text{th}}$  and  $j^{\text{th}}$  observation is calculated by:

$$3 \quad h_{(i,j)} = \sqrt{(x_i - x_j)^2 + (y_i - y_j)^2} \quad (1)$$

4 The  $\gamma(h)$ -variance for a given distance ( $h$ ) is defined by:

$$5 \quad \gamma(h) = \frac{1}{2}(z_i - z_j)^2 \quad (2)$$

6 where ( $h$ )-variance is the semivariance (i.e., the degree of dissimilarity) of the  $z$  value between the  
7 two observations, which is also the whole variance of  $z$  value for one observation at the given  
8 separation distance  $h$ , referred to as spatial variance here. The distance ( $h$ ) and spatial variance  
9 ( $\gamma(h)$ ) for all the data pairs are generated by the equations (1) and (2). Then, the average values of  
10 spatial variance for each distance interval are calculated to plot the averaged spatial variance versus  
11 distance. The fitting of variograms were determined using GS+ Version 10 (Gamma Design  
12 Software) by both minimizing the residual sum of squares (RSS) and maximizing the leave-one-  
13 out cross-validation result (see below). Spherical and Exponential variogram models were used in  
14 this study.

15 The formular of the spherical model is:

$$16 \quad \gamma(h) = \begin{cases} c_0 + c \left[ \frac{3h}{2a} - \frac{1}{2} \left( \frac{h}{a} \right)^3 \right] & \text{for } h \leq a \\ c_0 + c & \text{for } h > a \end{cases} \quad (3)$$

17 where  $c_0$  is the y-intercept of variogram (or the nugget constant);  $c_0 + c$  is the plateau (or the sill)  
18 of variogram;  $a$  is the effective range.

1 The formular of the Exponential model is:

$$2 \quad \gamma(h) = c_0 + c * (1 - \exp\left(-\frac{h}{a}\right)) \quad (4)$$

3 where  $c_0$  is the y-intercept of variogram (or the nugget constant),  $c_0 + c$  is the plateau (or the sill)  
4 of variogram,  $a$  is the range (effective range is  $3a$ ).

5 The molecular variogram defines quantitatively the correlation between the spatial variance of  $z$   
6 changes and the separation distance defined by the  $x$  and  $y$  coordinates based on known mutations.  
7 The distance where the model curve first flattens out is known as the range. Locations separated  
8 by distances closer than the range are spatially correlated, whereas locations farther apart than the  
9 range are not. The variogram enables us to compute the spatial covariance (SCV) matrices for any  
10 possible separation vector. The SCV at the distance ( $h$ ) is calculated by  $C(h) = C(0) - \gamma(h)$ , where  
11  $C(0)$  is the covariance at zero distance representing the global variance of the data points under  
12 consideration (i.e., the plateau of the variogram).

13 ***Assessing the uncertainty.*** GPR based Kriging aims to generate the prediction that has  
14 minimized estimation error, i.e., error variance, which is generated according to the expression:

$$15 \quad \sigma_u^2 = E[(z_u^* - z_u)^2] = \sum_{i=1}^n \sum_{j=1}^n \omega_i \omega_j C_{i,j} - 2 \sum_{i=1}^n \omega_i C_{i,u} + C_{u,u} \quad (5)$$

16 where  $z_u^*$  is the prediction value while  $z_u$  is the true but unknown value,  $C_{i,j}$  and  $C_{i,u}$  are SCV  
17 between data points  $i$  and  $j$ , and data points  $i$  and  $u$ , respectively, and  $C_{u,u}$  is the SCV within location  
18  $u$ .  $\omega_i$  is the weight for data point  $i$ . The SCV is obtained from the above molecular variogram  
19 analysis and the weight ( $\omega_i$ ) solved from equation (5) is used for following prediction. To ensure  
20 an unbiased result, the sum of weight is set as one:

1  $\sum_{i=1}^n \omega_i = 1$  (6)

2 Equations (5) and (6) not only solved the set of weights associated with input observations, but  
3 also provide the minimized ‘molecular variance’ at location  $u$  which can be expressed as:

4  $\sigma_u^2 = C_{u,u} - (\sum_{i=1}^n \omega_i C_{i,u} + \mu)$  (7)

5 where  $C_{u,u}$  is the SCV within location  $u$ ,  $\omega_i$  is the weight for data point  $i$ , and  $C_{i,u}$  are SCV between  
6 data points  $i$  and  $u$ .  $\mu$  is the Lagrange Parameter that is used to convert the constrained minimization  
7 problem in Equation (5) into an unconstrained one. The resulting minimized molecular variance  
8 assessing the prediction uncertainty presents the confidence level of the prediction.

9 ***The matrix notation.*** The minimization of GPR-based Kriging variance (equation (5)) with  
10 the constraint that the sum of the weights is 1 (equation (6)) can be written in matrix form as

11  $C \cdot W = D$

12

13 
$$\begin{bmatrix} C_{1,1} & \cdots & C_{1,n} & 1 \\ \vdots & \ddots & \vdots & \vdots \\ C_{n,1} & \cdots & C_{n,n} & 1 \\ 1 & \cdots & 1 & 0 \end{bmatrix} \cdot \begin{bmatrix} \omega_1 \\ \vdots \\ \omega_n \\ \mu \end{bmatrix} = \begin{bmatrix} C_{1,u} \\ \vdots \\ C_{n,u} \\ 1 \end{bmatrix}$$
 (8)

14 where ‘ $C$ ’ is the covariance matrix of the known data points. ‘ $W$ ’ is the set of weights assigned to  
15 the known data points for generating the predicted phenotype landscape. ‘ $\mu$ ’ is the Lagrange  
16 multiplier to convert a constrained minimization problem into an unconstrained one. ‘ $D$ ’ is the  
17 covariance matrix between known data points to the unknown data points. Since ‘ $W$ ’ is the value  
18 we want to solve to generate the fitness landscape, this equation can be also written as

$$W = \underbrace{C^{-1}}_{\text{Clustering}} \cdot \underbrace{D}_{\text{Distance}} \quad (9)$$

Where ‘C<sup>-1</sup>’ is the inverse form of the ‘C’ matrix.

As a more intuitive explanation of the GPR-based Kriging matrix notation, herein we simply refer to the VSP matrix that generates the fitness landscape (‘W’) to be based on the two important computational features used for predicting the unknown fitness values from the known- (1) the clustering (i.e., clustered sequence values with similar fitness properties ‘C<sup>-1</sup>’) and (2) the distance constraints (D). Here, ‘C<sup>-1</sup>’ represents the clustering information of the known data points while ‘D’ represents predicted statistical distance between known data points to unknown data points.

**Generating the prediction.** With the solved weights W, we can calculate the prediction of all unknown values to generate the complete fitness landscape by the equation:

$$z_u^* = \sum_{i=1}^n \omega_i z_i \quad (10)$$

where  $z_u^*$  is the prediction value for the unknown data point  $u$ ,  $\omega_i$  is the weight for the known data point, and  $z_i$  is the measured value for data point  $i$ .

**Prediction validation and input data requirements.** Leave-one-out cross-validation (LOOCV) is used because of small sample size modeling (116). In the LOOCV, we remove each data point, one at a time and use the rest of the data points to predict the missing value. We repeat the prediction for all data points and compare the prediction results to the measured value to generate the Pearson’s r-value and its associated p-value (ANOVA test performed in Originpro version 2020b (OriginLab)). Sampling data input required for reliable GPR-based Kriging or VSP

1 prediction not only depends on the sample size (number of boreholes/locations/(variant equivalents  
2 for studies herein)) but also depends on the spatial distribution of the samples. In the previous  
3 study (48), we have showed that the VSP prediction accuracy is stable until the number of training  
4 data points drops below ~50, consistent with the empirical rule of ~50 data points and above  
5 recommended in geostatistical studies.

6 ***Mapping fitness landscape onto structure.*** Fitness landscapes predicted based on a sparse  
7 collection of mutations contain experimental information that comprises the full range of values  
8 on y- and z-axis for the entire polypeptide sequence (x-axis). To map the fitness predictions onto  
9 structure, we assign the prediction value with highest confidence to each residue to generate a  
10 fitness structure displaying at atomic resolution that illustrates values on all the residues  
11 interpolated in the fitness landscape from the sparse collection mutations. For the structural  
12 mapping of the fitness landscape of the Alpha VOC and Delta VOC, there are cases where multiple  
13 different high confidence values are located on a single residue. For these residues, we select the  
14 prediction with highest fitness score that are within top 1% confident region. PDB:6yyt is used for  
15 fitness structure mapping. The structural presentations were produced by the software of PyMOL.

16 **Data and materials availability:** All the input source data, R-code scripts and output files are  
17 shared through the link:

18 <https://www.dropbox.com/sh/s2j7vrw5pa6ky60/AAAuZUiGYj0rP6ElikWOjm75a?dl=0>

19 **Acknowledgement:** We thank Daniel Shak and Dr. Salvatore Loguercio for the help on working  
20 with the mutation information from 2019nCoV database from CNCB. We gratefully  
21 acknowledge all the authors from the originating laboratories responsible for obtaining the SARS-  
22 CoV-2 samples and the laboratories where SARS-CoV-2 genetic sequence data were generated



1 and shared via the GISAID initiative, NCBI or CNCB, on which this research is based. Support  
2 was provided by NIH grants DK051870; HL141810; HL095524; AG070209; AG049665.

3 **Author contribution:** C.W., N.E.-M and W.E.B designed the study. C.W. collected the mutation  
4 information, performed Foldx and GPR analysis. N.E.-M performed the MD simulation. C.W.,  
5 N.E.M., and W.E.B. wrote the manuscript.

6 **Declaration of Interests:** The author declare no competing interests. The authors declare no  
7 advisory, management, or consulting positions.

## 8 **References:**

- 9 1. C. Huang *et al.*, Clinical features of patients infected with 2019 novel coronavirus in  
10 Wuhan, China. *Lancet* **395**, 497-506 (2020).
- 11 2. Q. Li *et al.*, Early Transmission Dynamics in Wuhan, China, of Novel Coronavirus-  
12 Infected Pneumonia. *N Engl J Med* **382**, 1199-1207 (2020).
- 13 3. F. Wu *et al.*, A new coronavirus associated with human respiratory disease in China.  
14 *Nature* **579**, 265-269 (2020).
- 15 4. P. Zhou *et al.*, A pneumonia outbreak associated with a new coronavirus of probable bat  
16 origin. *Nature* **579**, 270-273 (2020).
- 17 5. E. Dong, H. Du, L. Gardner, An interactive web-based dashboard to track COVID-19 in  
18 real time. *Lancet Infect Dis* **20**, 533-534 (2020).
- 19 6. T. Koyama, D. Platt, L. Parida, Variant analysis of SARS-CoV-2 genomes. *Bull World*  
20 *Health Organ* **98**, 495-504 (2020).
- 21 7. S. Elbe, G. Buckland-Merrett, Data, disease and diplomacy: GISAID's innovative  
22 contribution to global health. *Glob Chall* **1**, 33-46 (2017).
- 23 8. Y. Shu, J. McCauley, GISAID: Global initiative on sharing all influenza data - from  
24 vision to reality. *Euro Surveill* **22** (2017).
- 25 9. S. Song *et al.*, The Global Landscape of SARS-CoV-2 Genomes, Variants, and  
26 Haplotypes in 2019nCoV. *Genomics Proteomics Bioinformatics*  
27 [10.1016/j.gpb.2020.09.001](https://doi.org/10.1016/j.gpb.2020.09.001) (2020).
- 28 10. J. Singer, R. Gifford, M. Cotten, D. Robertson, CoV-GLUE: A Web Application for  
29 Tracking SARS-CoV-2 Genomic Variation. *Preprints* **2020060225** doi:  
30 **10.20944/preprints202006.0225.v1** (2020).
- 31 11. Z. Gong *et al.*, An online coronavirus analysis platform from the National Genomics Data  
32 Center. *Zool Res* **41**, 705-708 (2020).
- 33 12. W. M. Zhao *et al.*, The 2019 novel coronavirus resource. *Yi Chuan* **42**, 212-221 (2020).

- 1 13. L. C. Strotz *et al.*, Getting somewhere with the Red Queen: chasing a biologically  
2 modern definition of the hypothesis. *Biology Letters* **14**, 20170734 (2018).
- 3 14. L. Carroll, *Through the Looking-Glass, and What Alice Found There* (1872), pp. 208.
- 4 15. J. A. Plante *et al.*, The Variant Gambit: COVID's Next Move. *Cell Host & Microbe*  
5 10.1016/j.chom.2021.02.020 (2021).
- 6 16. W. T. Harvey *et al.*, SARS-CoV-2 variants, spike mutations and immune escape. *Nature*  
7 *Reviews Microbiology* 10.1038/s41579-021-00573-0 (2021).
- 8 17. K. Tao *et al.*, The biological and clinical significance of emerging SARS-CoV-2 variants.  
9 *Nature Reviews Genetics* **22**, 757-773 (2021).
- 10 18. B. Korber *et al.*, Tracking Changes in SARS-CoV-2 Spike: Evidence that D614G  
11 Increases Infectivity of the COVID-19 Virus. *Cell* **182**, 812-827 e819 (2020).
- 12 19. D. Weissman *et al.*, D614G Spike Mutation Increases SARS CoV-2 Susceptibility to  
13 Neutralization. *Cell Host Microbe* **29**, 23-31 e24 (2021).
- 14 20. L. Zhang *et al.*, SARS-CoV-2 spike-protein D614G mutation increases virion spike  
15 density and infectivity. *Nat Commun* **11**, 6013 (2020).
- 16 21. Y. J. Hou *et al.*, SARS-CoV-2 D614G variant exhibits efficient replication ex vivo and  
17 transmission in vivo. *Science* **370**, 1464-1468 (2020).
- 18 22. E. Volz *et al.*, Evaluating the Effects of SARS-CoV-2 Spike Mutation D614G on  
19 Transmissibility and Pathogenicity. *Cell* **184**, 64-75 e11 (2021).
- 20 23. D. E. Gordon *et al.*, A SARS-CoV-2 protein interaction map reveals targets for drug  
21 repurposing. *Nature* **583**, 459-468 (2020).
- 22 24. Y. Finkel *et al.*, The coding capacity of SARS-CoV-2. *Nature* **589**, 125-130 (2021).
- 23 25. P. V'kovski, A. Kratzel, S. Steiner, H. Stalder, V. Thiel, Coronavirus biology and  
24 replication: implications for SARS-CoV-2. *Nature Reviews Microbiology* **19**, 155-170  
25 (2021).
- 26 26. O. A. MacLean *et al.*, Natural selection in the evolution of SARS-CoV-2 in bats created a  
27 generalist virus and highly capable human pathogen. *PLoS Biol* **19**, e3001115 (2021).
- 28 27. Q. Peng *et al.*, Structural and Biochemical Characterization of the nsp12-nsp7-nsp8 Core  
29 Polymerase Complex from SARS-CoV-2. *Cell Rep* **31**, 107774 (2020).
- 30 28. Q. Wang *et al.*, Structural Basis for RNA Replication by the SARS-CoV-2 Polymerase.  
31 *Cell* **182**, 417-428 e413 (2020).
- 32 29. H. S. Hillen *et al.*, Structure of replicating SARS-CoV-2 polymerase. *Nature* **584**, 154-  
33 156 (2020).
- 34 30. Y. Gao *et al.*, Structure of the RNA-dependent RNA polymerase from COVID-19 virus.  
35 *Science* **368**, 779-782 (2020).
- 36 31. L. Subissi *et al.*, One severe acute respiratory syndrome coronavirus protein complex  
37 integrates processive RNA polymerase and exonuclease activities. *Proc Natl Acad Sci U*  
38 *SA* **111**, E3900-3909 (2014).
- 39 32. W. Yin *et al.*, Structural basis for inhibition of the RNA-dependent RNA polymerase  
40 from SARS-CoV-2 by remdesivir. *Science* **368**, 1499-1504 (2020).
- 41 33. G. Kokic *et al.*, Mechanism of SARS-CoV-2 polymerase stalling by remdesivir. *Nature*  
42 *Communications* **12**, 279 (2021).
- 43 34. F. Kabinger *et al.*, Mechanism of molnupiravir-induced SARS-CoV-2 mutagenesis. *Nat*  
44 *Struct Mol Biol* **28**, 740-746 (2021).
- 45 35. B. Malone, E. A. Campbell, Molnupiravir: coding for catastrophe. *Nat Struct Mol Biol*  
46 **28**, 706-708 (2021).

- 1 36. A. Jayk Bernal *et al.*, Molnupiravir for Oral Treatment of Covid-19 in Nonhospitalized  
2 Patients. *N Engl J Med* 10.1056/NEJMoa2116044 (2021).
- 3 37. M. Wang *et al.*, Remdesivir and chloroquine effectively inhibit the recently emerged  
4 novel coronavirus (2019-nCoV) in vitro. *Cell Research* **30**, 269-271 (2020).
- 5 38. A. J. Pruijssers *et al.*, Remdesivir Inhibits SARS-CoV-2 in Human Lung Cells and  
6 Chimeric SARS-CoV Expressing the SARS-CoV-2 RNA Polymerase in Mice. *Cell Rep*  
7 **32**, 107940 (2020).
- 8 39. C. J. Gordon, E. P. Tchesnokov, R. F. Schinazi, M. Götter, Molnupiravir promotes SARS-  
9 CoV-2 mutagenesis via the RNA template. *J Biol Chem* **297**, 100770 (2021).
- 10 40. R. Abdelnabi *et al.*, Molnupiravir Inhibits Replication of the Emerging SARS-CoV-2  
11 Variants of Concern in a Hamster Infection Model. *J Infect Dis* **224**, 749-753 (2021).
- 12 41. F. Kabinger *et al.*, Mechanism of molnupiravir-induced SARS-CoV-2 mutagenesis.  
13 *Nature Structural & Molecular Biology* **28**, 740-746 (2021).
- 14 42. J. Grein *et al.*, Compassionate Use of Remdesivir for Patients with Severe Covid-19. *N*  
15 *Engl J Med* **382**, 2327-2336 (2020).
- 16 43. J. H. Beigel *et al.*, Remdesivir for the Treatment of Covid-19 - Final Report. *N Engl J*  
17 *Med* **383**, 1813-1826 (2020).
- 18 44. W. H. O. S. T. Consortium *et al.*, Repurposed Antiviral Drugs for Covid-19 - Interim  
19 WHO Solidarity Trial Results. *N Engl J Med* **384**, 497-511 (2021).
- 20 45. A. Moya, E. C. Holmes, F. González-Candelas, The population genetics and evolutionary  
21 epidemiology of RNA viruses. *Nature Reviews Microbiology* **2**, 279-288 (2004).
- 22 46. N. D. Grubaugh, M. E. Petrone, E. C. Holmes, We shouldn't worry when a virus mutates  
23 during disease outbreaks. *Nature Microbiology* **5**, 529-530 (2020).
- 24 47. J. L. Geoghegan, E. C. Holmes, The phylogenomics of evolving virus virulence. *Nat Rev*  
25 *Genet* **19**, 756-769 (2018).
- 26 48. C. Wang, W. E. Balch, Bridging Genomics to Phenomics at Atomic Resolution through  
27 Variation Spatial Profiling. *Cell Rep* **24**, 2013-2028 e2016 (2018).
- 28 49. C. Wang *et al.*, Quantitating the epigenetic transformation contributing to cholesterol  
29 homeostasis using Gaussian process. *Nat Commun* **10**, 5052 (2019).
- 30 50. C. Wang *et al.*, Individualized management of genetic diversity in Niemann-Pick C1  
31 through modulation of the Hsp70 chaperone system. *Hum Mol Genet* **29**, 1-19 (2020).
- 32 51. C. E. Rasmussen, C. K. I. Williams, *Gaussian Processes for Machine Learning* (The MIT  
33 Press, 2006).
- 34 52. J.-P. Chiles, P. Delfiner, *Geostatistics : Modeling Spatial Uncertainty*. (2012).
- 35 53. B. Hie, B. D. Bryson, B. Berger, Leveraging Uncertainty in Machine Learning  
36 Accelerates Biological Discovery and Design. *Cell Systems* **11**, 461-477.e469 (2020).
- 37 54. P. A. Romero, A. Krause, F. H. Arnold, Navigating the protein fitness landscape with  
38 Gaussian processes. *Proc Natl Acad Sci U S A* **110**, E193-201 (2013).
- 39 55. J. Delgado, L. G. Radusky, D. Cianferoni, L. Serrano, FoldX 5.0: working with RNA,  
40 small molecules and a new graphical interface. *Bioinformatics* **35**, 4168-4169 (2019).
- 41 56. J. Schymkowitz *et al.*, The FoldX web server: an online force field. *Nucleic Acids Res* **33**,  
42 W382-388 (2005).
- 43 57. R. A. Studer, P. A. Christin, M. A. Williams, C. A. Orengo, Stability-activity tradeoffs  
44 constrain the adaptive evolution of RubisCO. *Proc Natl Acad Sci U S A* **111**, 2223-2228  
45 (2014).

- 1 58. K. C. Lehmann *et al.*, Discovery of an essential nucleotidylating activity associated with  
2 a newly delineated conserved domain in the RNA polymerase-containing protein of all  
3 nidoviruses. *Nucleic Acids Res* **43**, 8416-8434 (2015).
- 4 59. J. Chen *et al.*, Structural Basis for Helicase-Polymerase Coupling in the SARS-CoV-2  
5 Replication-Transcription Complex. *Cell* **182**, 1560-1573.e1513 (2020).
- 6 60. H. S. Hillen, Structure and function of SARS-CoV-2 polymerase. *Curr Opin Virol* **48**,  
7 82-90 (2021).
- 8 61. L. Yan *et al.*, Cryo-EM Structure of an Extended SARS-CoV-2 Replication and  
9 Transcription Complex Reveals an Intermediate State in Cap Synthesis. *Cell* **184**, 184-  
10 193.e110 (2021).
- 11 62. L. Yan *et al.*, Coupling of N7-methyltransferase and 3'-5' exoribonuclease with SARS-  
12 CoV-2 polymerase reveals mechanisms for capping and proofreading. *Cell*  
13 <https://doi.org/10.1016/j.cell.2021.05.033> (2021).
- 14 63. H. Slanina *et al.*, Coronavirus replication–transcription complex: Vital and selective  
15 NMPylation of a conserved site in nsp9 by the NiRAN-RdRp subunit. *Proceedings of the*  
16 *National Academy of Sciences* **118**, e2022310118 (2021).
- 17 64. Z.-Z. Li, L. Li, Z. Shao, Robust Gaussian process regression based on iterative trimming.  
18 *Astronomy and Computing* **36**, 100483 (2021).
- 19 65. S.-M. Kim, Y. Choi, H.-D. Park, New Outlier Top-Cut Method for Mineral Resource  
20 Estimation via 3D Hot Spot Analysis of Borehole Data. *Minerals* **8** (2018).
- 21 66. M. Maleki, N. Madani, X. Emery, Capping and kriging grades with long-tailed  
22 distributions. *Journal of the Southern African Institute of Mining and Metallurgy* **114**,  
23 255-263 (2014).
- 24 67. J. Rivoirard, C. Demange, X. Freulon, A. Lécureuil, N. Bellot, A Top-Cut Model for  
25 Deposits with Heavy-Tailed Grade Distribution. *Mathematical Geosciences* **45**, 967-982  
26 (2013).
- 27 68. N. G. Davies *et al.*, Estimated transmissibility and impact of SARS-CoV-2 lineage  
28 B.1.1.7 in England. *Science* 10.1126/science.abg3055, eabg3055 (2021).
- 29 69. N. L. Washington *et al.*, Emergence and rapid transmission of SARS-CoV-2 B.1.1.7 in  
30 the United States. *Cell* <https://doi.org/10.1016/j.cell.2021.03.052> (2021).
- 31 70. A. A. Latif *et al.* (2021) outbreak.info. ([https://outbreak.info/situation-  
32 reports?pango=B.1.617.2&loc=IND&loc=GBR&loc=USA&selected=Worldwide&overl  
33 ay=false](https://outbreak.info/situation-reports?pango=B.1.617.2&loc=IND&loc=GBR&loc=USA&selected=Worldwide&overlay=false)).
- 34 71. B. Li *et al.*, Viral infection and transmission in a large, well-traced outbreak caused by  
35 the SARS-CoV-2 Delta variant. *medRxiv* 10.1101/2021.07.07.21260122,  
36 2021.2007.2007.21260122 (2021).
- 37 72. Y. Wang *et al.*, Transmission, viral kinetics and clinical characteristics of the emergent  
38 SARS-CoV-2 Delta VOC in Guangzhou, China. *EClinicalMedicine* **40**, 101129 (2021).
- 39 73. R. Earnest *et al.*, Comparative transmissibility of SARS-CoV-2 variants Delta and Alpha  
40 in New England, USA. *medRxiv* 10.1101/2021.10.06.21264641 (2021).
- 41 74. C. H. Luo *et al.*, Infection with the SARS-CoV-2 Delta Variant is Associated with Higher  
42 Infectious Virus Loads Compared to the Alpha Variant in both Unvaccinated and  
43 Vaccinated Individuals. *medRxiv* 10.1101/2021.08.15.21262077,  
44 2021.2008.2015.21262077 (2021).
- 45 75. S. J. Spielman *et al.*, "Evolution of Viral Genomes: Interplay Between Selection,  
46 Recombination, and Other Forces" in *Evolutionary Genomics: Statistical and*

- 1 Computational Methods, M. Anisimova, Ed. (Springer New York, New York, NY,  
2 2019), 10.1007/978-1-4939-9074-0\_14, pp. 427-468.
- 3 76. Z. Yang, J. P. Bielawski, Statistical methods for detecting molecular adaptation. *Trends*  
4 *Ecol Evol* **15**, 496-503 (2000).
- 5 77. D. VanInsberghe, A. S. Neish, A. C. Lowen, K. Koelle, Recombinant SARS-CoV-2  
6 genomes are currently circulating at low levels. *bioRxiv* 10.1101/2020.08.05.238386,  
7 2020.2008.2005.238386 (2021).
- 8 78. L. van Dorp *et al.*, No evidence for increased transmissibility from recurrent mutations in  
9 SARS-CoV-2. *Nature Communications* **11**, 5986 (2020).
- 10 79. B. Jackson *et al.*, Generation and transmission of inter-lineage recombinants in the  
11 SARS-CoV-2 pandemic. *Cell* <https://doi.org/10.1016/j.cell.2021.08.014> (2021).
- 12 80. L. Rink, H. Haase, Zinc homeostasis and immunity. *Trends Immunol* **28**, 1-4 (2007).
- 13 81. S. A. Read, S. Obeid, C. Ahlenstiel, G. Ahlenstiel, The Role of Zinc in Antiviral  
14 Immunity. *Advances in Nutrition* **10**, 696-710 (2019).
- 15 82. A. J. W. te Velhuis *et al.*, Zn<sup>2+</sup> Inhibits Coronavirus and Arterivirus RNA Polymerase  
16 Activity In Vitro and Zinc Ionophores Block the Replication of These Viruses in Cell  
17 Culture. *PLOS Pathogens* **6**, e1001176 (2010).
- 18 83. M. Vogel-González *et al.*, Low Zinc Levels at Admission Associates with Poor Clinical  
19 Outcomes in SARS-CoV-2 Infection. *Nutrients* **13** (2021).
- 20 84. Y. Yasui *et al.*, Analysis of the predictive factors for a critical illness of COVID-19  
21 during treatment – relationship between serum zinc level and critical illness of COVID-  
22 19 –. *International Journal of Infectious Diseases* **100**, 230-236 (2020).
- 23 85. D. Jothimani *et al.*, COVID-19: Poor outcomes in patients with zinc deficiency.  
24 *International Journal of Infectious Diseases* **100**, 343-349 (2020).
- 25 86. N. Maio *et al.*, Fe-S cofactors in the SARS-CoV-2 RNA-dependent RNA polymerase are  
26 potential antiviral targets. *Science* 10.1126/science.abi5224, eabi5224 (2021).
- 27 87. K. Naydenova *et al.*, Structure of the SARS-CoV-2 RNA-dependent RNA polymerase in  
28 the presence of favipiravir-RTP. *Proceedings of the National Academy of Sciences* **118**,  
29 e2021946118 (2021).
- 30 88. C. Wang, F. Angles, W. E. Balch, Triangulating Variation for Precision Management of  
31 Genetic Disease. *Structure Under Review* (2021).
- 32 89. A. Rambaut *et al.*, Preliminary genomic characterisation of an emergent SARS-CoV-2  
33 lineage in the UK defined by a novel set of spike mutations. <https://virological.org/t/563>  
34 (2020, December 18).
- 35 90. M. U. G. Kraemer *et al.*, Spatiotemporal invasion dynamics of SARS-CoV-2 lineage  
36 B.1.1.7 emergence. *Science* 10.1126/science.abj0113 (2021).
- 37 91. A. Dwivedy *et al.*, Characterization of the NiRAN domain from RNA-dependent RNA  
38 polymerase provides insights into a potential therapeutic target against SARS-CoV-2.  
39 *PLoS Comput Biol* **17**, e1009384 (2021).
- 40 92. E. Cameron *et al.*, Broadly neutralizing antibodies overcome SARS-CoV-2 Omicron  
41 antigenic shift. *bioRxiv* 10.1101/2021.12.12.472269, 2021.2012.2012.472269 (2021).
- 42 93. I. Nemet *et al.*, Third BNT162b2 vaccination neutralization of SARS-CoV-2 Omicron  
43 infection. *medRxiv* 10.1101/2021.12.13.21267670, 2021.2012.2013.21267670 (2021).
- 44 94. K. Basile *et al.*, Improved neutralization of the SARS-CoV-2 Omicron variant after  
45 Pfizer-BioNTech BNT162b2 COVID-19 vaccine boosting. *bioRxiv*  
46 10.1101/2021.12.12.472252, 2021.2012.2012.472252 (2021).

- 1 95. W. F. Garcia-Beltran *et al.*, mRNA-based COVID-19 vaccine boosters induce  
2 neutralizing immunity against SARS-CoV-2 Omicron variant. *medRxiv*  
3 10.1101/2021.12.14.21267755, 2021.2012.2014.21267755 (2021).
- 4 96. A. Rössler, L. Riepler, D. Bante, D. v. Laer, J. Kimpel, SARS-CoV-2 B.1.1.529 variant  
5 (Omicron) evades neutralization by sera from vaccinated and convalescent individuals.  
6 *medRxiv* 10.1101/2021.12.08.21267491, 2021.2012.2008.21267491 (2021).
- 7 97. N. Wolter *et al.*, Early assessment of the clinical severity of the SARS-CoV-2 Omicron  
8 variant in South Africa. *medRxiv* 10.1101/2021.12.21.21268116,  
9 2021.2012.2021.21268116 (2021).
- 10 98. A. Sheikh, S. Kerr, M. Woolhouse, J. McMenamin, C. Robertson, Severity of Omicron  
11 variant of concern and vaccine effectiveness against symptomatic disease: national cohort  
12 with nested test negative design study in Scotland.  
13 [https://www.research.ed.ac.uk/en/publications/severity-of-omicron-variant-of-concern-](https://www.research.ed.ac.uk/en/publications/severity-of-omicron-variant-of-concern-and-vaccine-effectiveness-)  
14 [and-vaccine-effectiveness-](https://www.research.ed.ac.uk/en/publications/severity-of-omicron-variant-of-concern-and-vaccine-effectiveness-) (2021).
- 15 99. C. Wang, P. Zhao, S. Sun, J. Teckman, W. E. Balch, Leveraging Population Genomics  
16 for Individualized Correction of the Hallmarks of Alpha-1 Antitrypsin Deficiency.  
17 *Chronic Obstr Pulm Dis* **7**, 224-246 (2020).
- 18 100. A. Frederic, W. Chao, B. William, Spatial Covariant Management of Thermodynamics  
19 Contributes to Protein Fold Function through Quality Assurance. *Nature Portfolio*  
20 10.21203/rs.3.rs-717846/v1 (2021).
- 21 101. A. Rambaut *et al.*, A dynamic nomenclature proposal for SARS-CoV-2 lineages to assist  
22 genomic epidemiology. *Nature Microbiology* **5**, 1403-1407 (2020).
- 23 102. O. Buß, J. Rudat, K. Ochsenreither, FoldX as Protein Engineering Tool: Better Than  
24 Random Based Approaches? *Comput Struct Biotechnol J* **16**, 25-33 (2018).
- 25 103. M. Petrosino *et al.*, Analysis and Interpretation of the Impact of Missense Variants in  
26 Cancer. *Int J Mol Sci* **22** (2021).
- 27 104. M. S. Bahia *et al.*, Stability Prediction for Mutations in the Cytosolic Domains of Cystic  
28 Fibrosis Transmembrane Conductance Regulator. *Journal of Chemical Information and*  
29 *Modeling* **61**, 1762-1777 (2021).
- 30 105. R. Geller, S. Pechmann, A. Acevedo, R. Andino, J. Frydman, Hsp90 shapes protein and  
31 RNA evolution to balance trade-offs between protein stability and aggregation. *Nat*  
32 *Commun* **9**, 1781 (2018).
- 33 106. R. A. Studer, P.-A. Christin, M. A. Williams, C. A. Orengo, Stability-activity tradeoffs  
34 constrain the adaptive evolution of RubisCO. *Proceedings of the National Academy of*  
35 *Sciences* **111**, 2223 (2014).
- 36 107. V. Potapov, M. Cohen, G. Schreiber, Assessing computational methods for predicting  
37 protein stability upon mutation: good on average but not in the details. *Protein*  
38 *Engineering, Design and Selection* **22**, 553-560 (2009).
- 39 108. N. J. Christensen, K. P. Kepp, Stability Mechanisms of Laccase Isoforms using a  
40 Modified FoldX Protocol Applicable to Widely Different Proteins. *J Chem Theory*  
41 *Comput* **9**, 3210-3223 (2013).
- 42 109. L. Gerasimavicius, X. Liu, J. A. Marsh, Identification of pathogenic missense mutations  
43 using protein stability predictors. *Scientific Reports* **10**, 15387 (2020).
- 44 110. E. F. Pettersen *et al.*, UCSF Chimera--a visualization system for exploratory research and  
45 analysis. *J Comput Chem* **25**, 1605-1612 (2004).

- 1 111. B. R. Brooks *et al.*, CHARMM: A program for macromolecular energy, minimization,  
2 and dynamics calculations. *Journal of Computational Chemistry* **4**, 187-217 (1983).
- 3 112. G. Kieseritzky, E. W. Knapp, Optimizing pKa computation in proteins with pH adapted  
4 conformations. *Proteins* **71**, 1335-1348 (2008).
- 5 113. W. L. Jorgensen, J. Chandrasekhar, J. D. Madura, R. W. Impey, M. L. Klein, Comparison  
6 of simple potential functions for simulating liquid water. *The Journal of Chemical*  
7 *Physics* **79**, 926-935 (1983).
- 8 114. R. H. Stote, M. Karplus, Zinc binding in proteins and solution: a simple but accurate  
9 nonbonded representation. *Proteins* **23**, 12-31 (1995).
- 10 115. U. Essmann *et al.*, A smooth particle mesh Ewald method. *The Journal of Chemical*  
11 *Physics* **103**, 8577-8593 (1995).
- 12 116. Y. Zhang, Y. Yang, Cross-validation for selecting a model selection procedure. *Journal*  
13 *of Econometrics* **187**, 95-112 (2015).

14

15

## 1 Figures and figure legends:

Figure 1

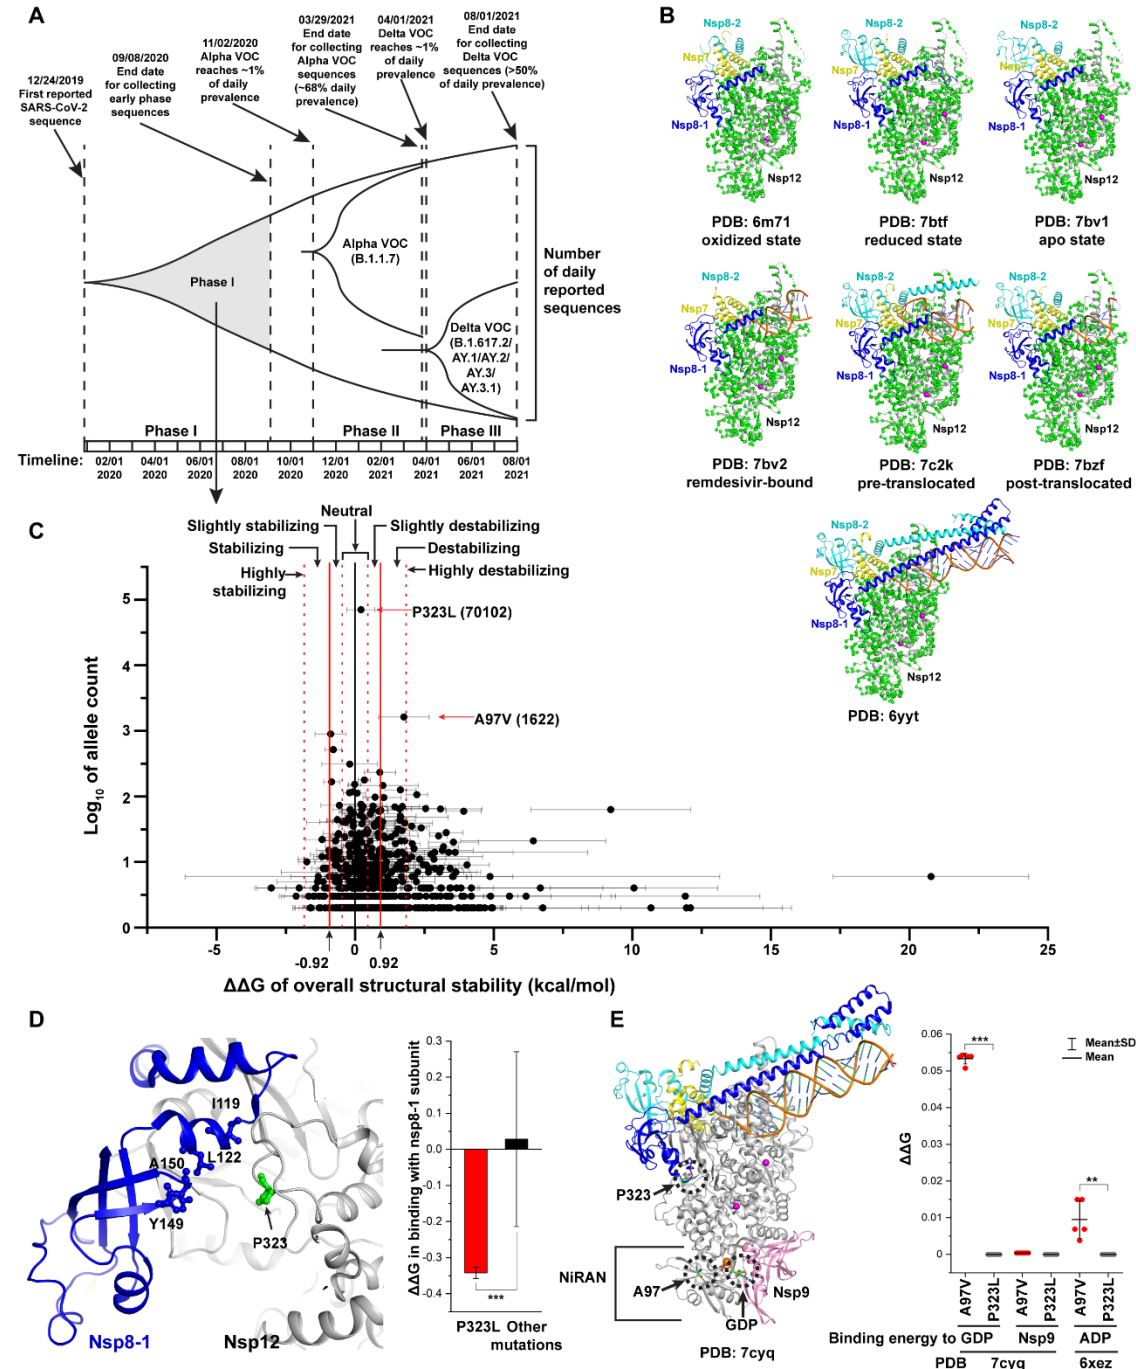

2 **Figure 1. Impact of mutations on structural thermodynamic stability of nsp12.** (A) Timeline  
 3 of the early ‘phase I’ of the pandemic before the surge of Alpha VOC in the ‘phase II’ and the  
 4 Delta VOC in the ‘phase III’ of the pandemic. The early phase I sequences do not contain any



1 Alpha or Delta VOC as the end date for collecting the early phase I sequences (Sept.08, 2020) is  
2 before the first submission date for the first Alpha or Delta VOC sequences. **(B)** Structures of  
3 RdRp used for the analysis of mutation impact on structural stability. The C-alpha atoms of the  
4 amino acid residues corresponding to mutation positions of nsp12 are highlighted as green balls.  
5 Disulfide bonds in the oxidized structure (6m71) are shown as purple sticks while the bound  
6  $Zn^{2+}$  ions in other structures are showed as purple balls. **(C)** The averaged  $\Delta\Delta G$  of structural  
7 stability and the associated allele count for each nsp12 mutation. The mutations are classified as  
8 seven categories based on the averaged  $\Delta\Delta G$  (**see Methods**). P323L and A97V are labeled with  
9 their allele count. **(D)** Residue P323 is located at the interface between nsp8-1 (blue) and nsp12  
10 (gray) (left panel). The interacting residues with P323 in nsp8-1 are shown as sticks and labeled.  
11 Mutation P323L shows a significant stabilizing  $\Delta\Delta G$  when compared with other mutations (right  
12 panel) (Student's t-test with Welch correction for unequal variance, \*\*\* $p < 0.001$ ). **(E)** Residue  
13 A97 is located in the NiRAN domain that binds to nsp9 (left panel). A97V destabilizes GDP and  
14 ADP binding when compared with P323L (right panel) (Student's t-test, \*\* $p < 0.01$ , \*\*\* $p < 0.001$ ).

**Figure 2**

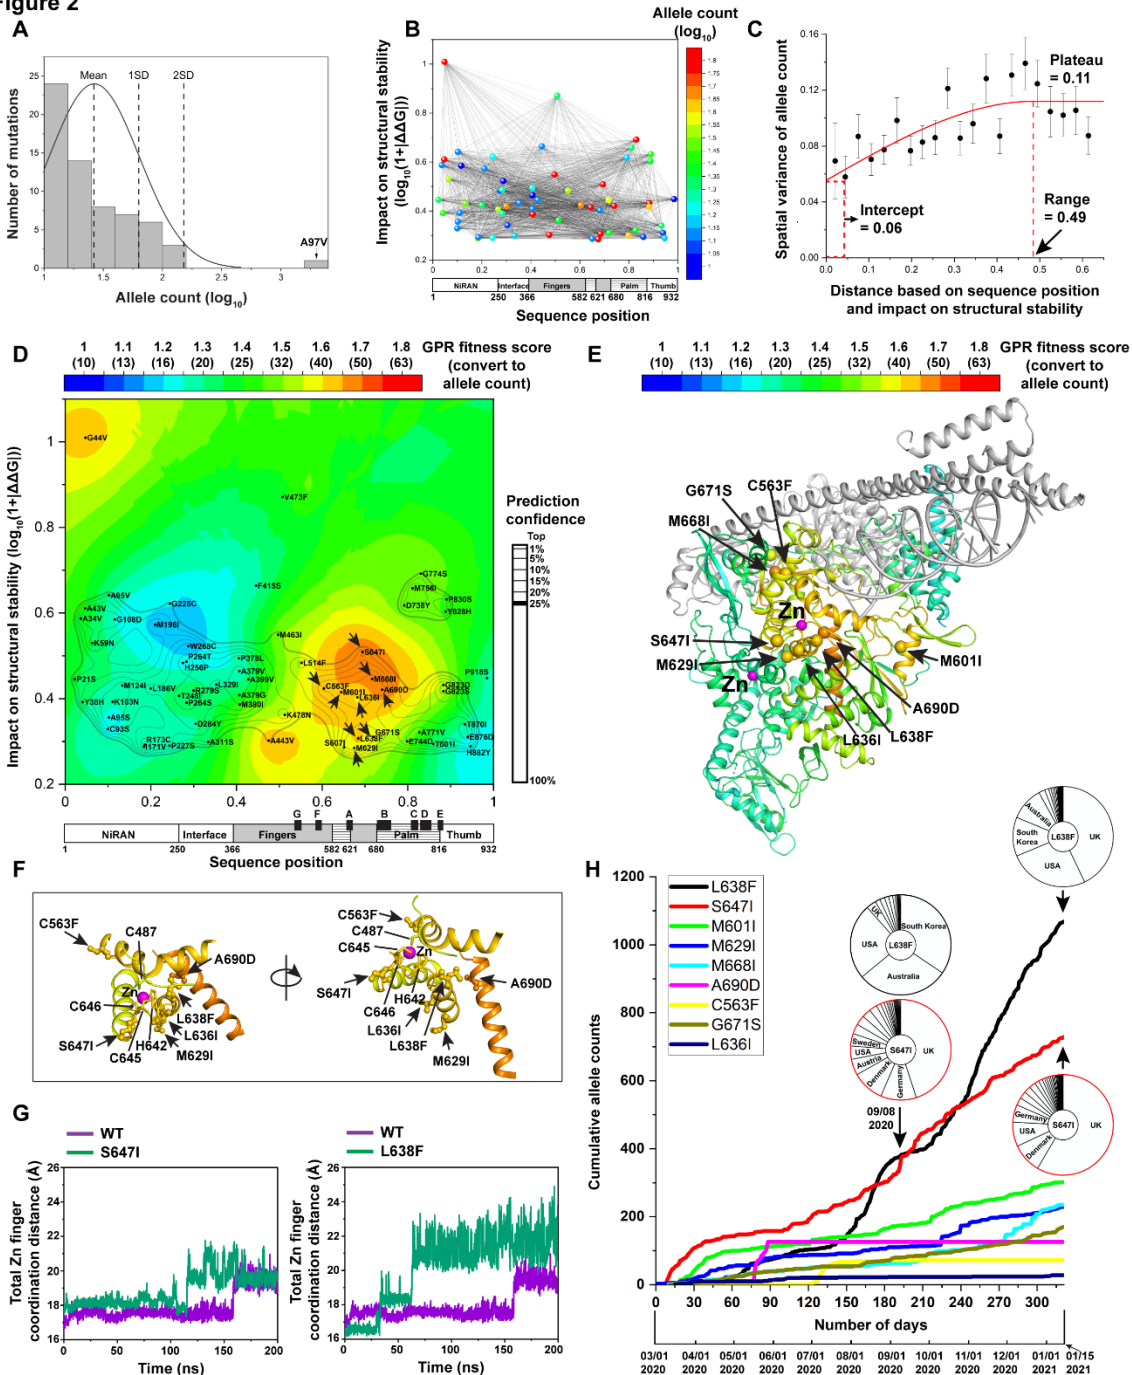

- 1 **Figure 2. GPR fitness landscape identifies a covariant fitness cluster adjusting  $Zn^{2+}$  binding.**
- 2 (A) Distribution of the allele counts for nsp12 mutations. Mean, one standard deviation and two
- 3 standard deviations of the distribution are indicated. (B) Nsp12 mutations are positioned by their
- 4 residue positions ( $x$ -axis) and impact on structural stability ( $y$ -axis) and colored by their allele

1 count ( $z$ -axis). The pairwise spatial relationships (indicated by black lines) are determined by GPR  
2 (see **Methods**). (C) The molecular variogram showing spatial relationships between the separation  
3 distance of paired datapoints in (B) and their spatial variance for the allele counts (see **Methods**).  
4 (D) GPR based ‘fitness landscape’ for nsp12 mutations. The predicted ‘GPR fitness score’ is  
5 indicated as color scale and the predicted spatial uncertainty (or confidence) is indicated by contour  
6 lines with the top 25% confidence indicated as bold. (E) The highest confidence prediction of the  
7 GPR fitness score on each residue is mapped to the RdRp structure to construct a ‘fitness structure’.  
8 (F) The residues where the mutations have strong GPR fitness scores around the C487-H642-  
9 C645-C646  $Zn^{2+}$  binding motif are indicated. (G) Comparison of total  $Zn^{2+}$  binding coordination  
10 distance for S647I (green) (left panel) or L638F (green) (right panel) with WT (purple) found in  
11 the MD simulations of the RdRp structure. Sum of eight coordination distances ( $\text{\AA}$ ) to the bonded  
12  $Zn^{2+}$  (C487-H642-C645-C646 and H295-C301-C306-C310) are plotted for WT (purple) and  
13 S647I (green) according to simulation time course. (H) Cumulative allele counts according to time  
14 for the mutations in the covariant fitness cluster. The country distributions of S647I and L638F at  
15 two time points (Sept.08, 2020 and Jan.15, 2021) are shown.

**Figure 3**

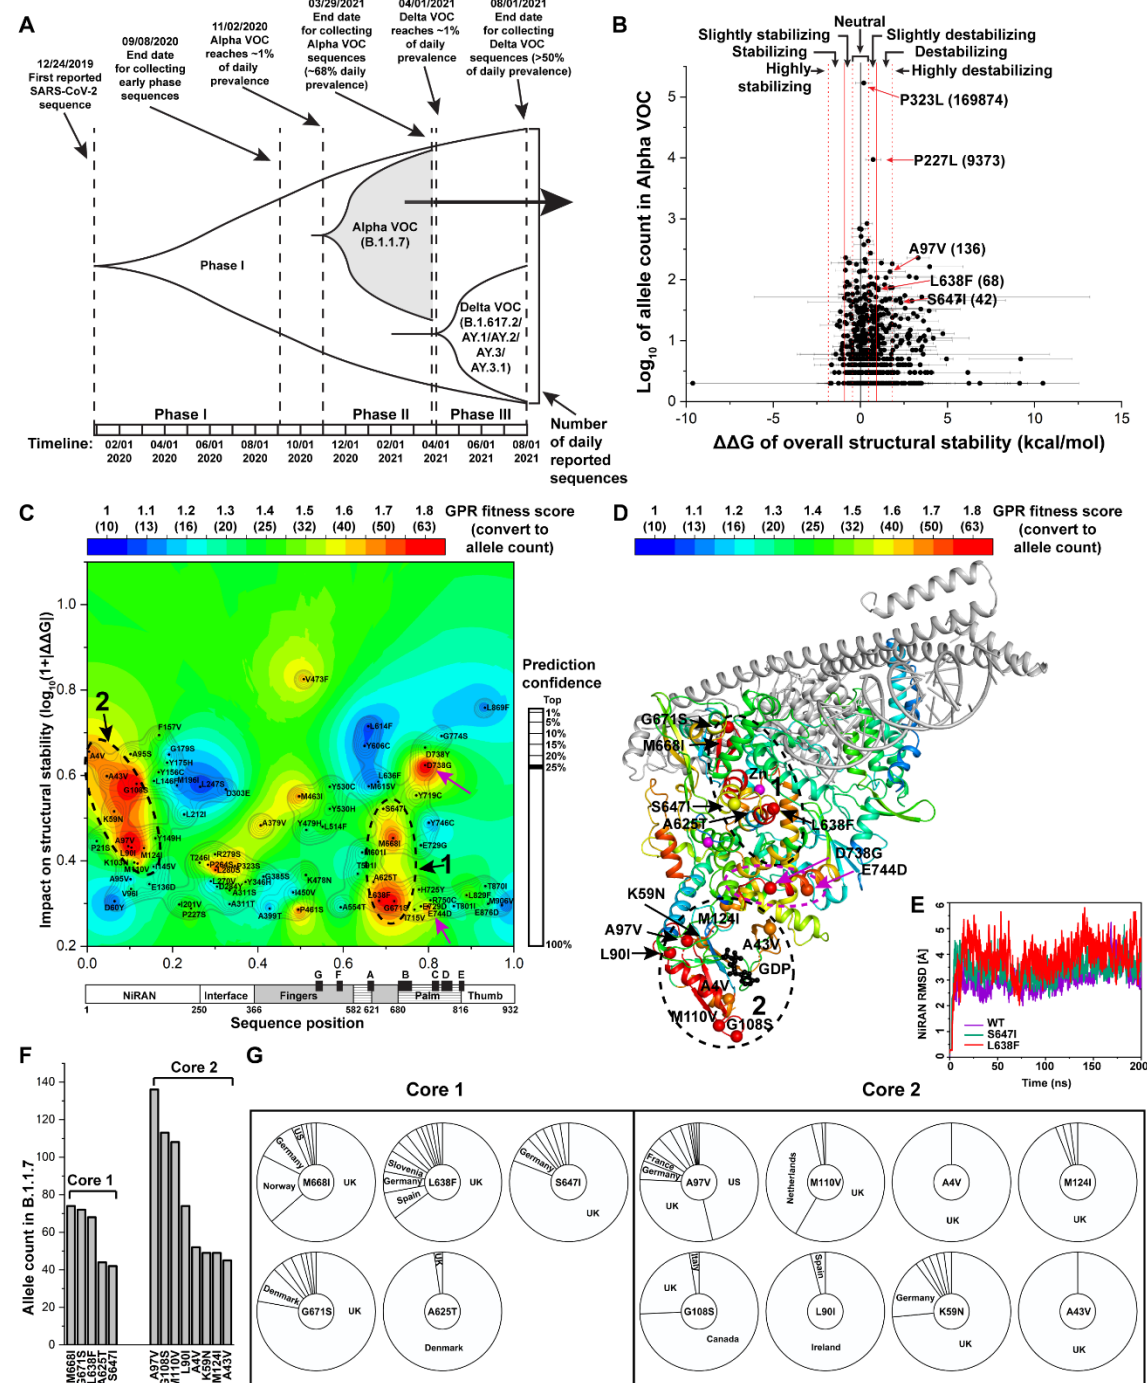

1 **Figure 3. GPR fitness landscape for nsp12 mutations in the Alpha VOC. (A)** Timeline of the  
 2 surge of the Alpha VOC in the phase II of the pandemic. The date of ~1% daily prevalence of  
 3 Alpha VOC is indicated as the start date of phase II. All Alpha VOC sequences up to Mar.29, 2021  
 4 were included in the analyses. **(B)** The impact of nsp12 mutations in the Alpha VOC on the RdRp

1 structural stability. Highlighted mutations are labeled with their allele counts. **(C)** GPR fitness  
2 landscape for the nsp12 mutations in Alpha VOC. The covariant fitness cluster around the C487-  
3 H642-C645-C646 Zn<sup>2+</sup> binding motif is labeled as cluster 1 and the covariant fitness cluster in the  
4 NiRAN domain is labeled as cluster 2. **(D)** Structural mapping of the GPR fitness landscape. The  
5 mutations with high GPR fitness scores found in the covariant fitness clusters 1 and 2 are labeled.  
6 The mutations with high GPR fitness scores connecting clusters 1 and 2 are labeled and highlighted  
7 by magenta arrows. **(E)** The RMSD of NiRAN domain (residues 1-250) of WT (purple), S647I  
8 (green), and L638F (red), over 200 ns MD simulations. **(F-G)** Allele counts **(F)** and country  
9 distributions **(G)** of the mutations in covariant fitness clusters 1 and 2 in the Alpha VOC.

**Figure 4**

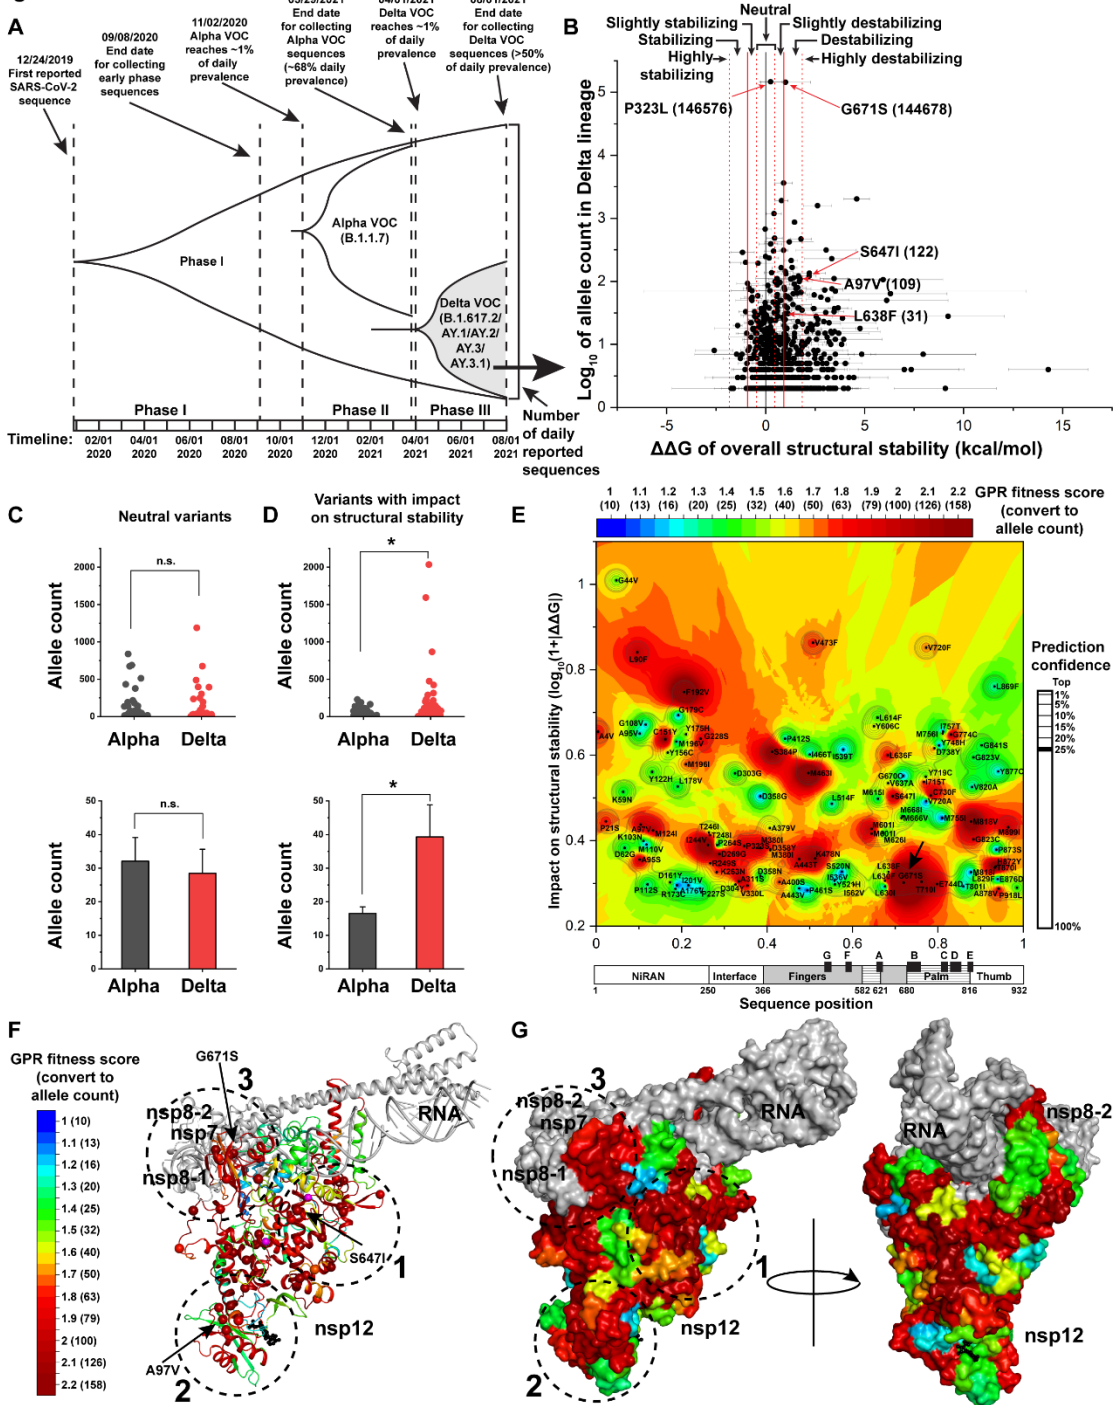

- Figure 4. GPR fitness landscape for nsp12 mutations in the Delta VOC.** (A) Timeline for the
- surge of Delta VOC. The date of ~1% daily prevalence of the Delta VOC is indicated for the
- beginning of the surge. All the Delta VOC sequences (B.1.617.2/AY.1/AY.2/AY.3/AY.3.1) up to
- Aug.01, 2021 shown. (B) The impact of nsp12 mutations in the Delta VOC on the RdRp structural

1 thermodynamic stability. **(C)** Comparison of the allele count for the neutral variants on the  
2 structural stability of the Alpha VOC and Delta VOC (Student's t-test). The basal sequence variant  
3 P323L for both Alpha VOC and Delta VOC is not included in the analysis. **(D)** Comparison of the  
4 allele count for the variants with significant structural impact ( $\Delta\Delta G > 0.92$  or  $\Delta\Delta G < -0.92$ ) in the  
5 Alpha VOC and Delta VOC (Student's t-test,  $*p < 0.05$ ). The basal sequence variant G671S in the  
6 Delta VOC is not included in the analysis. **(E)** GPR based structural stability fitness landscape for  
7 the nsp12 mutations in the Delta VOC. G671S is highlighted by a black arrow. **(F)** Structural  
8 mapping of the fitness landscape to construct the fitness structure. S647I nearby the  $Zn^{2+}$  binding  
9 motif, A97V in the NiRAN domain and the basal mutation G671S for the Delta VOC are labeled  
10 to highlight covariant fitness clusters 1, 2, and 3, respectively. **(G)** Surface representation of the  
11 fitness structure.

Figure 5

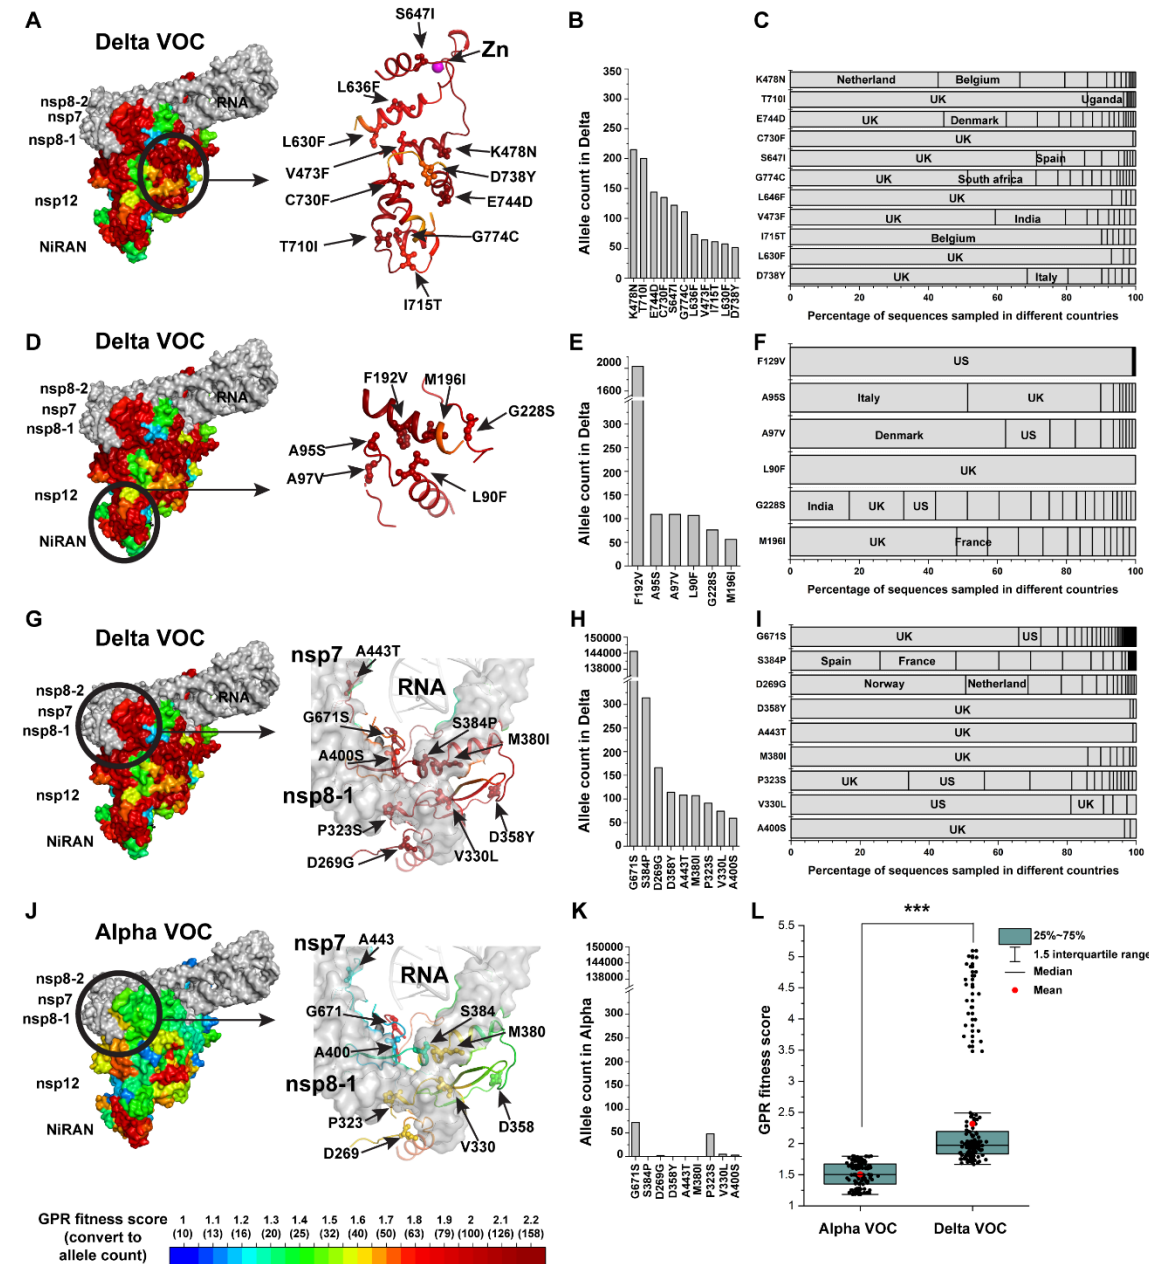

1 **Figure 5. Structural covariant fitness clusters in the RdRp of the Delta VOC. (A-I)** Residues  
 2 with high GPR fitness scores for the Delta VOC in covariant fitness cluster 1 (A-C), cluster 2 (D-  
 3 F) and cluster 3 (G-I) are separately illustrated. The allele count and country distribution for each  
 4 mutation are presented. (J) GPR fitness scores in the Alpha VOC for the residues in cluster 3 are  
 5 presented. (K) Allele counts in the Alpha VOC for the mutations in (H) are shown. (L) Comparison



- 1 of the GPR fitness scores between the Alpha VOC and Delta VOC for residues in cluster 3
- 2 (Student's t-test, \*\*\* $p < 0.001$ ).

## 1 Supplementary figures and legends:

Figure S1

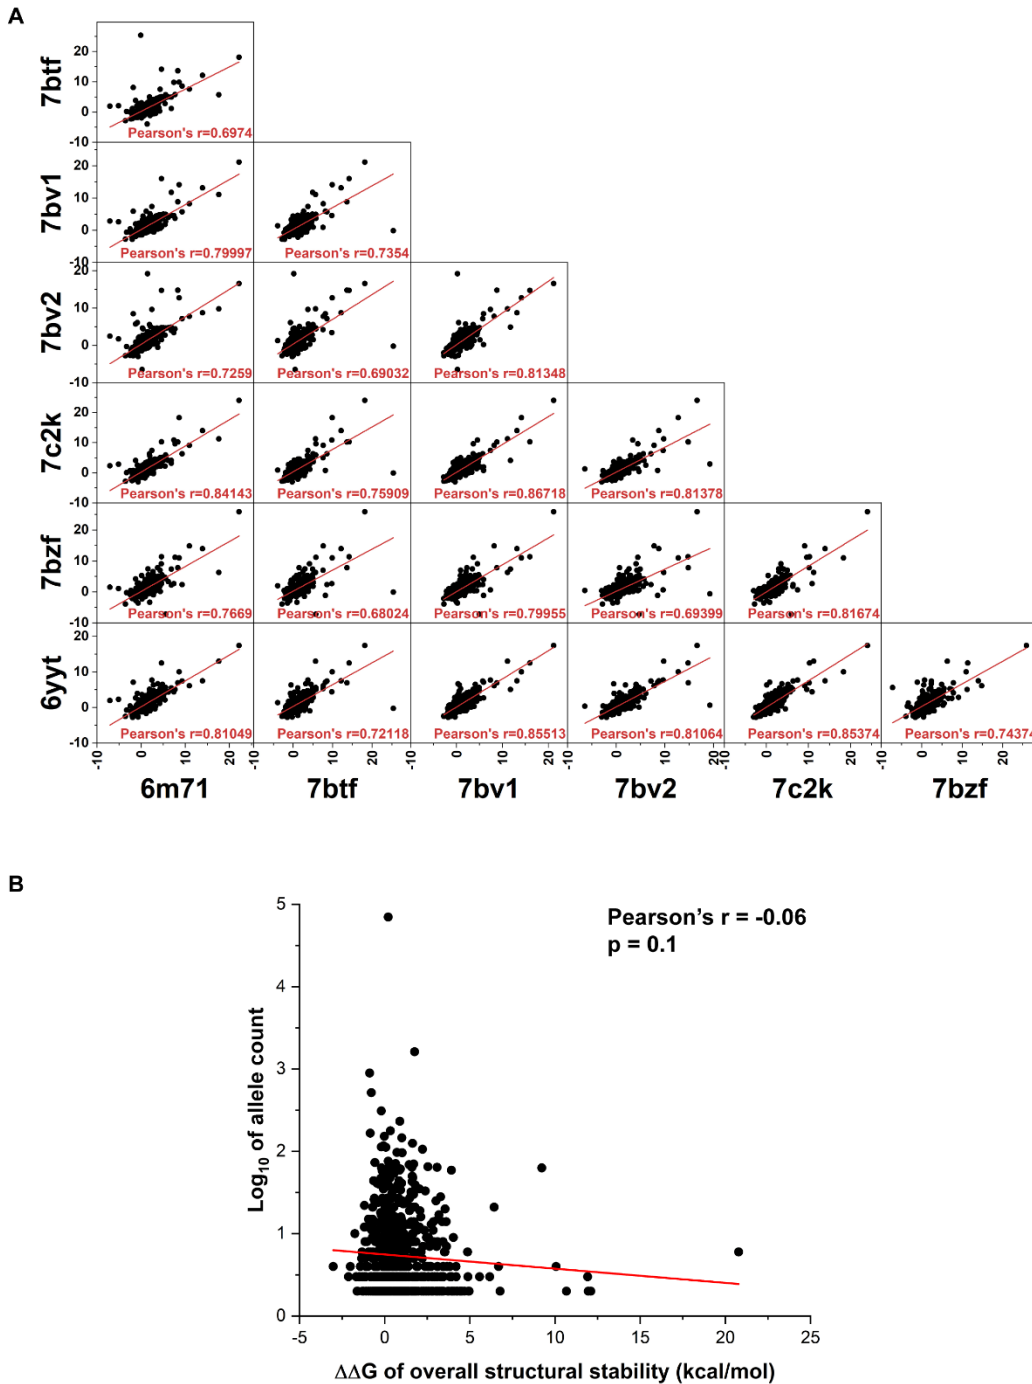

- 2 Figure S1. Correlation of the computed  $\Delta\Delta G$  (kcal/mol) for mutations in nsp12 between  
3 different structural states. (A) The PDB ID for each structure is labeled and Pearson's  $r$  of each

- 1 correlation is indicated. **(B)** Linear correlation between averaged  $\Delta\Delta G$  for nsp12 mutations and
- 2 their allele counts. Pearson's  $r$  and the p-value with null hypothesis of  $r = 0$  (ANOVA test) are
- 3 indicated.

Figure S2

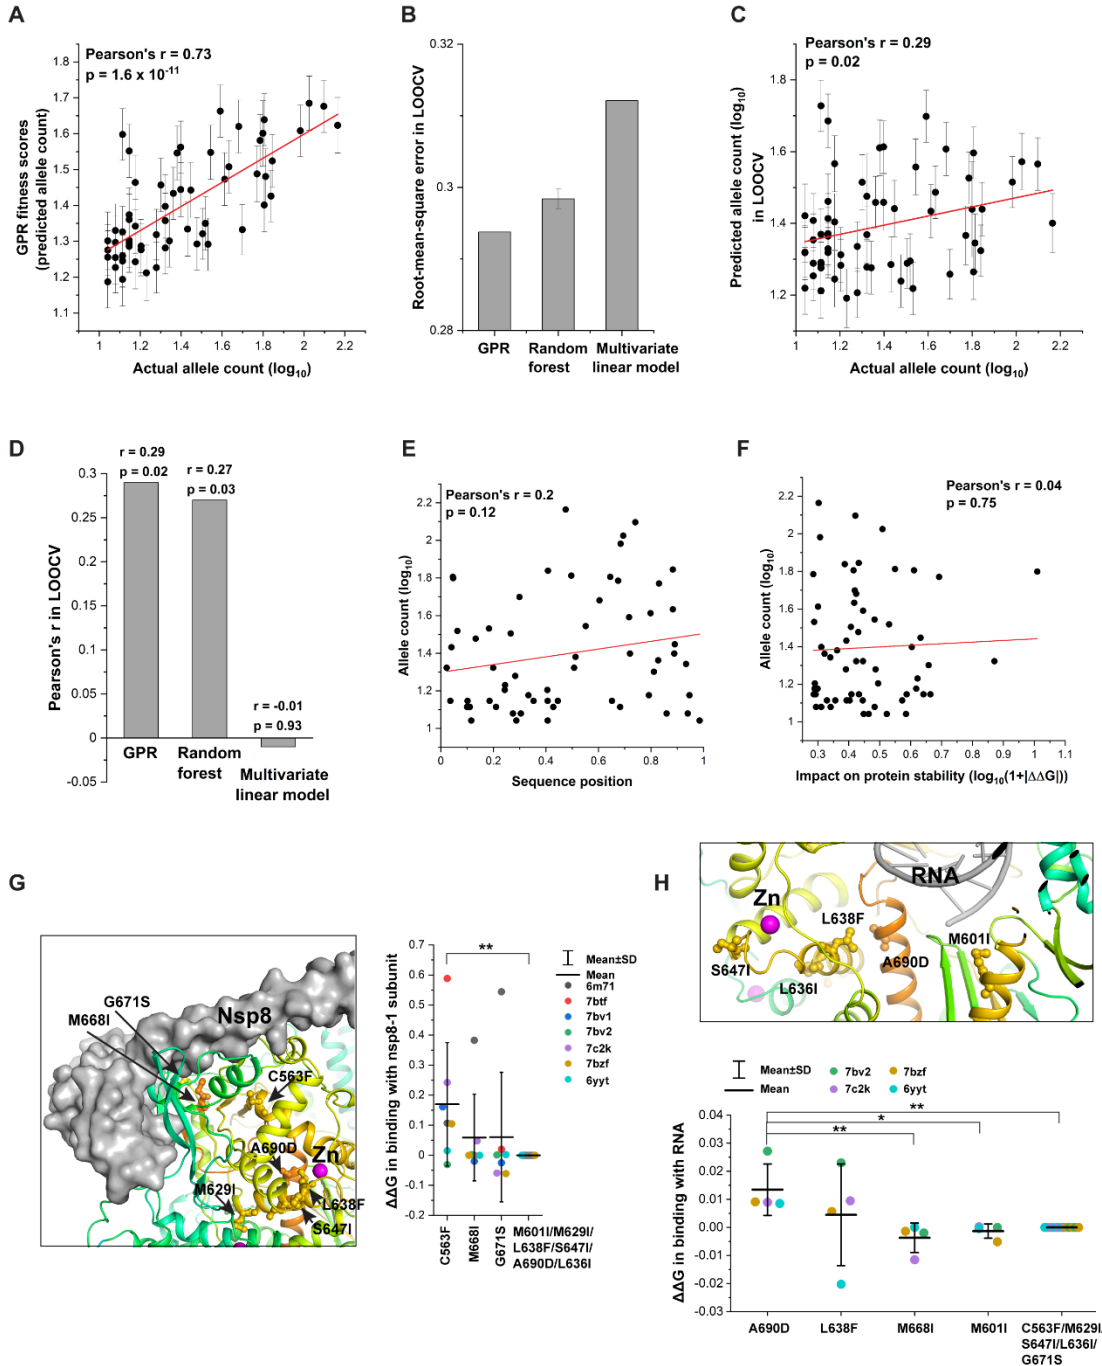

- 1 **Figure S2. Leave-one-out cross-validation (LOOCV) of the GPR fitness landscape. (A)**
- 2 Correlation between the GPR fitness scores (i.e., predicted allele counts) in the fitness landscape
- 3 for the input mutations and their actual allele counts. Pearson's  $r$  and the  $p$ -value with null
- 4 hypothesis of  $r = 0$  (ANOVA test) are indicated. Given that there is certain spatial variance at close

1 to “0” distance, as indicated in the variogram (**Fig. 2C**, y-intercept = 0.06), the GPR fitness scores  
2 in the landscape for the input mutations are not the same as their actual allele counts, but they are  
3 strongly correlated (Pearson’s  $r = 0.73$ ,  $p = 1.6 \times 10^{-11}$ ). (**B**) Root-mean-square error of GPR model,  
4 random forest model and multivariate linear model for LOOCV. (**C**) Correlation between the  
5 actual allele count and the predicted allele count in the LOOCV for the GPR model. Pearson’s  $r$   
6 and the p-value with null hypothesis of  $r = 0$  (ANOVA test) are indicated. (**D**) Comparisons of the  
7 correlation between the actual and predicted allele count in the LOOCV for GPR model, random  
8 forest model and multivariate linear model. (**E**) Correlation between the mutation sequence  
9 position and the allele count of mutation. (**F**) Correlation between the impact of mutation on  
10 structural stability and the allele count of mutation. While the predictions generated by both GPR  
11 and random forest achieve weak but significant correlations with the actual allele counts in  
12 LOOCV (**D**, Pearson’s  $r = 0.29$ ,  $p = 0.02$  (GPR); Pearson’s  $r = 0.27$ ,  $p = 0.03$  (random forest)), the  
13 multivariate linear model does not achieve a significant prediction (**D**; Pearson’s  $r = -0.01$ ,  $p =$   
14  $0.93$ ). Furthermore, there is no significant direct linear correlation either between mutation position  
15 and allele count (**E**; Pearson’s  $r = 0.2$ ,  $p = 0.12$ ) or between structural stability and allele count (**F**;  
16 Pearson’s  $r = 0.04$ ,  $p = 0.75$ ). These results demonstrate that SCV principled GPR modeling can  
17 capture the non-linear pattern in the dataset to link sequence position information of each of the  
18 mutations with the computed structural stability to the allele count. (**G**) Impact of the mutations in  
19 the ‘covariant fitness cluster’ on the binding energy between nsp8-1 and nsp12. C563F shows a  
20 significant destabilizing impact when compared with other mutations in the covariant fitness  
21 cluster (One-way ANOVA Tukey test,  $**p < 0.01$ ). (**H**) Impact of the mutations in the covariant  
22 fitness cluster on the binding energy to RNA. A690D shows a significant destabilizing impact  
23 when compared with other mutations (One-way ANOVA Tukey test,  $**p < 0.01$ ,  $*p < 0.05$ ).

Figure S3

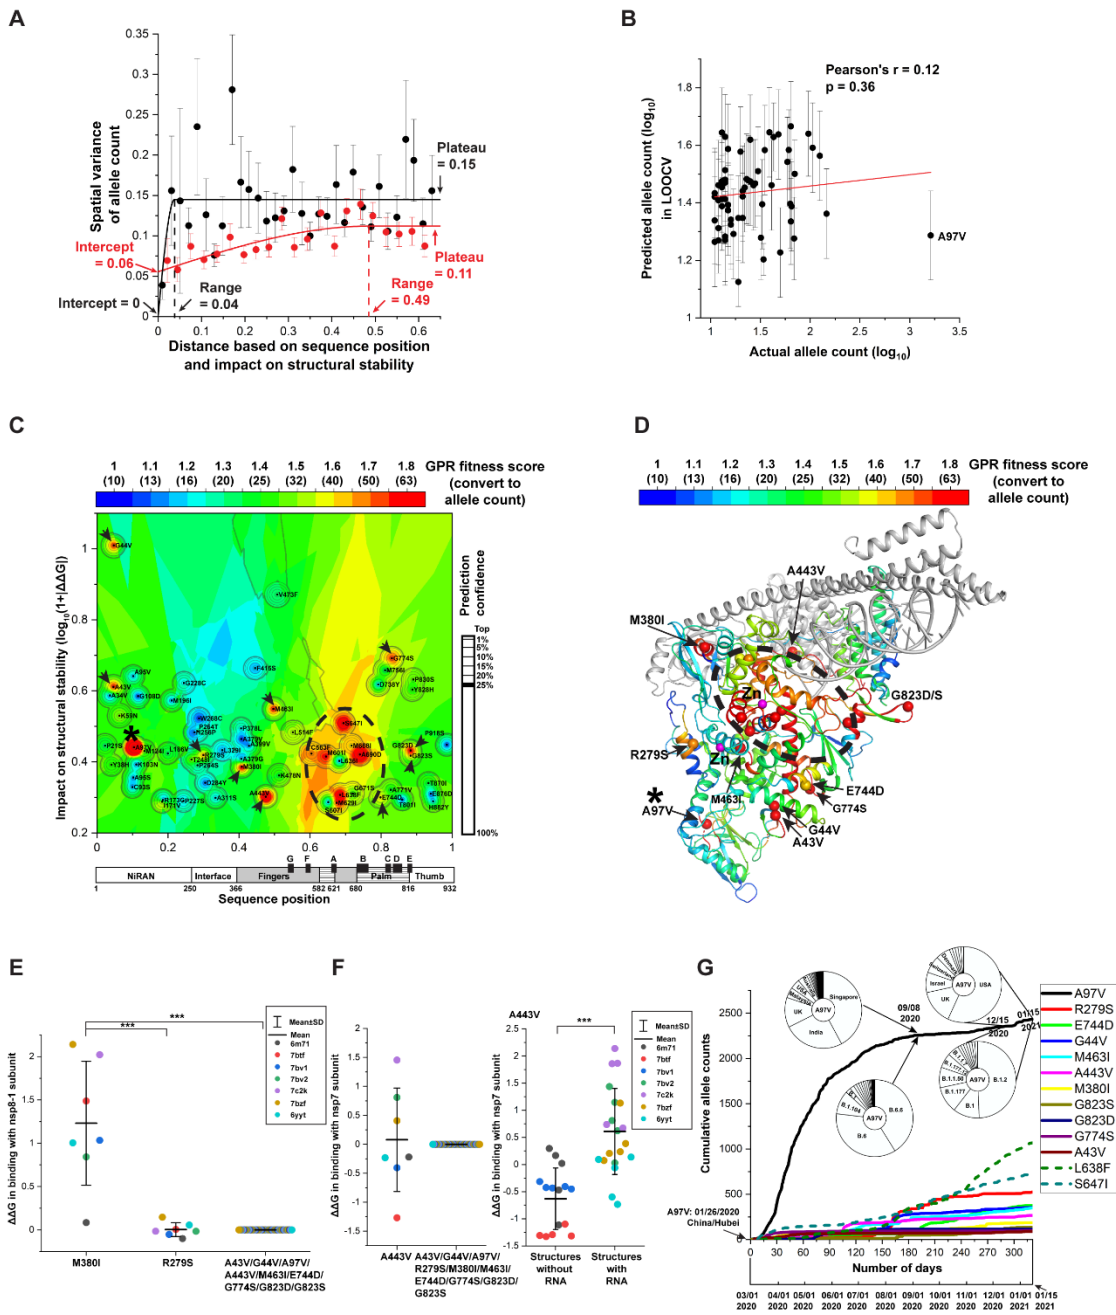

2 **Figure S3. GPR model including A97V.** (A) Molecular variograms with (black curve) or without  
 3 (red curve) A97V. Including A97V in the molecular variogram analysis results in a dramatic  
 4 decrease on both the correlation distance range (from 0.49 to 0.04) and y-intercept (from 0.06 to  
 5 0), and a significant increase on the plateau value representing the global variance of allele count

1 (from 0.11 to 0.15) (compare red curve with black curve). This result suggests that A97V with an  
2 exceptionally high allele count compacts long-range SCV relationships found in response to the  
3 other mutations to very short-range SCV relationships. **(B)** Correlation between the actual allele  
4 count and the predicted allele count in the LOOCV for the GPR model including A97V. Pearson's  
5  $r$  and the  $p$  value with null hypothesis of  $r = 0$  (ANOVA test) are indicated. In the LOOCV result,  
6 the allele count of A97V is underestimated by the GPR **(B)**, indicating that the allele count of  
7 A97V is dramatically higher than the surrounding variants. This observation suggests that there is  
8 not much evolution going on for the A97V interacting or surrounding residues, indicating potential  
9 random events contributing to the spread of A97V in the early phase I of the pandemic. **(C-D)**  
10 GPR fitness landscape **(C)** and fitness structure **(D)** for the GPR model including A97V. Mutations  
11 with high GPR fitness scores that are not observed in the A97V excluded model **(Fig. 2D-E)** are  
12 highlighted by arrows and A97V is highlighted by \*. Consistent with the fitness landscape and  
13 fitness structure without A97V **(Fig. 2D-E)**, the fitness landscape and fitness structure including  
14 A97V reveals high GPR fitness scores for the covariant fitness cluster around the  $Zn^{2+}$  binding  
15 motif **(C-D, dash circle)**. However, because of the short range in the variogram **(A, black curve)**,  
16 the GPR fitness landscape with A97V shows additional mutations with high GPR fitness scores  
17 **(C-D, arrows)** that were not observed in the GPR model without A97V **(Fig. 2D-E)**. These results  
18 reveal additional structural features that could contribute to the fitness of RdRp, for example: **(E)**  
19 M380I shows significant destabilizing impact on the binding energy with nsp8-1 (One-way  
20 ANOVA Tukey test, \*\*\* $p < 0.001$ ). **(F)** A443V shows stabilizing impact on the binding energy  
21 with nsp7 for structures without RNA while shows destabilizing impact for structures with RNA  
22 (Student's  $t$ -test, \*\*\* $p < 0.001$ ). **(G)** Cumulative allele counts for mutations according to time. The  
23 lineages and country distributions for A97V at Sept. 08, 2020, and between the period from Dec.

1 15, 2020, to Jan. 15, 2021, are indicated. A97V was first identified in the original epicenter of  
2 COVID-19, Hubei, China on Jan. 16, 2020. Then it rapidly spread to Singapore and India as shown  
3 at the time point of Sep. 08, 2020. There is a potential founder effect contributing to this phase of  
4 rapid spread of A97V given its introduction into new geographical locations (e.g., Singapore and  
5 India) at the beginning of the pandemic. While its cumulative allele count reached a plateau in  
6 early Sept 2020, after the middle of Dec. 2020, we observe an increase of its allele counts in the  
7 US and UK that can be found in multiple different SARS-CoV-2 lineages. In the early phase I of  
8 the pandemic, A97V is dominant in B.6.6 and B.6 lineages, but between Dec. 2020 and Jan. 2021,  
9 it arises in the B.1.2 and B.1 lineages. Importantly, A97V recurs in the Alpha VOC (B.1.1.7) that  
10 harbors an unique genomic signature of 17 defining mutations (101). Alpha VOC rapidly became  
11 one of the dominant SARS-CoV-2 lineages driving the pandemic in late 2020 and early 2021. The  
12 recurrence of this significant destabilizing mutation in multiple lineages indicates a functional and  
13 structural selection at this site.



Figure S4

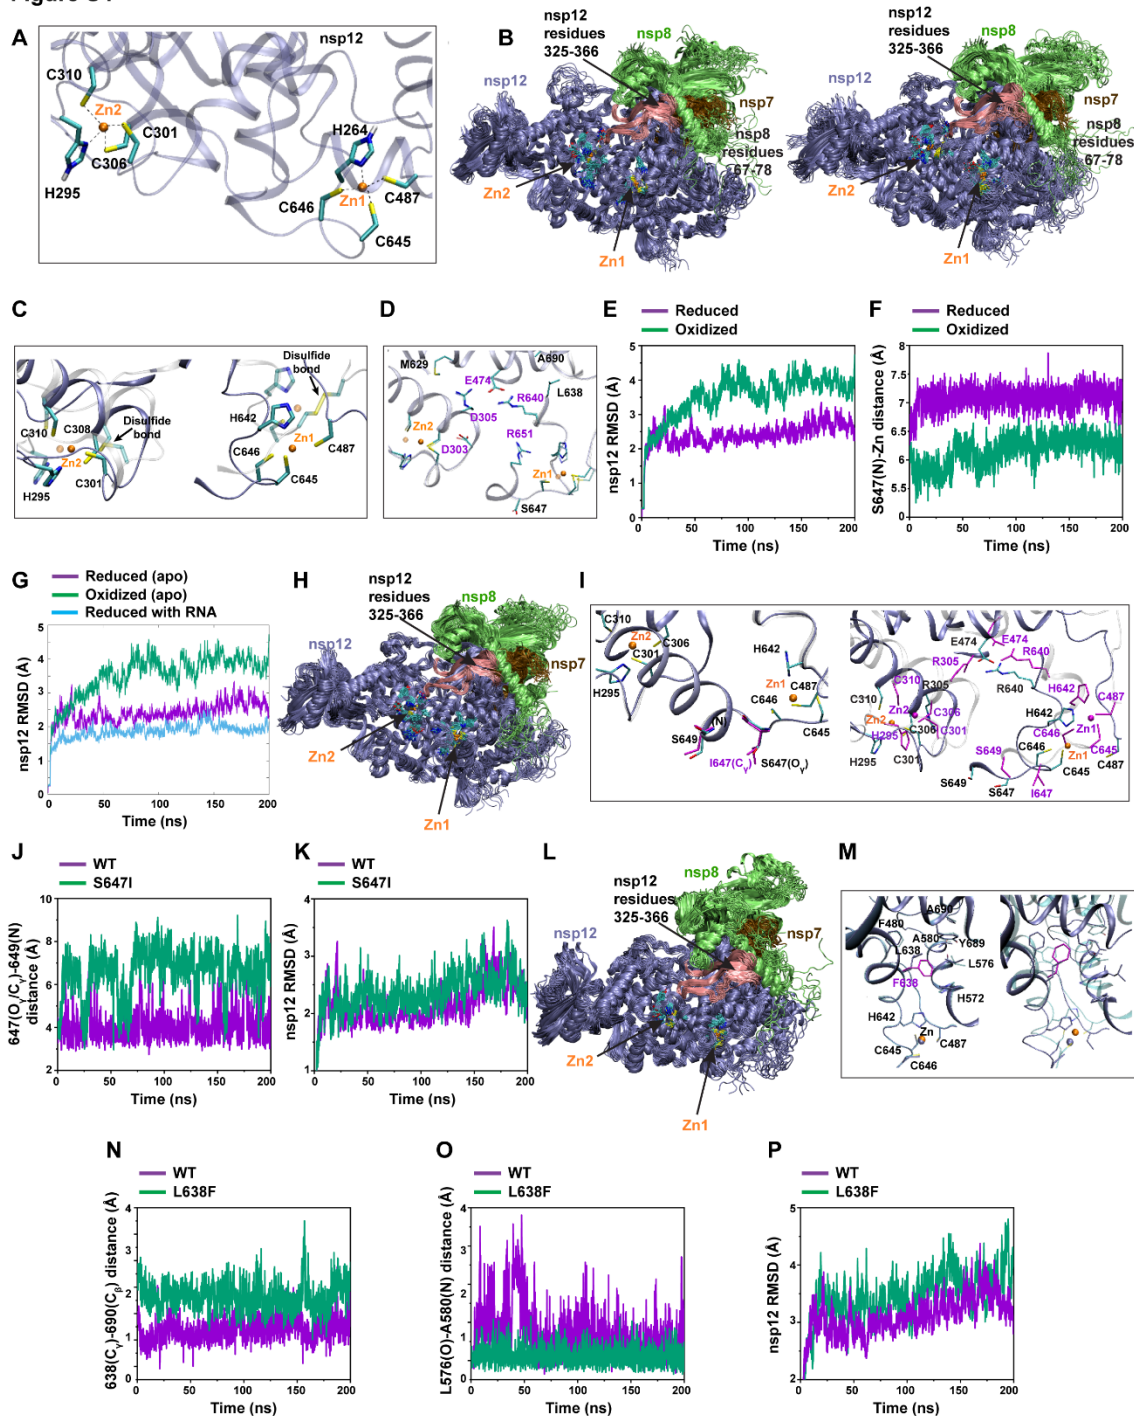

- 1 **Figure S4. MD simulations reveal the impact of Zn<sup>2+</sup> binding motifs on RdRp structures. (A)**
- 2 Zn<sup>2+</sup> binding motifs up-close for WT. The two Zn<sup>2+</sup> (Zn<sup>2+</sup> atoms shown in orange) binding motifs
- 3 in nsp12 are comprised of residues C487-H642-C645-C646, coordinated to Zn1, and H295-C301-

1 C306-C310, coordinated to Zn<sup>2+</sup>, respectively. Since C487-C645 and C301-C306 in the two Zn<sup>2+</sup>  
2 binding motifs can form disulfide bonds under oxidizing conditions (30), we first performed the  
3 simulations of WT RdRp under either reducing or oxidizing conditions to represent a redox-switch  
4 that regulates the Zn<sup>2+</sup> binding. Under reducing conditions, all cysteine residues are deprotonated,  
5 and the histidine side chains are protonated at the N $\epsilon$  position. Under oxidizing conditions,  
6 disulfide bonds are introduced between Cys301-Cys306 and between Cys487-C645, while Cys646  
7 and Cys310 remain deprotonated. **(B)** Time lapse (20 snapshots taken over 200 ns) depictions of  
8 WT RdRp in the reduced state (left) and oxidized state (right). We observed the nsp12 sheets  
9 comprised of residues 325-366 (**B**, pink  $\beta$ -strands) in contact with nsp8 are separated and less  
10 compact in the oxidized state than that in the reduced state. Moreover, residues 67-78 of nsp8-1  
11 (**B**, green subunit) which compose a truncated version of the long “poles” required to guide the  
12 replicating and exiting RNA (29), display different dynamic behaviors in oxidized versus reduced  
13 nsp12, showing that the chemistry of the Zn<sup>2+</sup> binding motif in nsp12 directly affects the dynamics  
14 of these residues in nsp8-1. **(C)** Snapshot of WT reduced (opaque) versus WT oxidized  
15 (transparent) at 200 ns. The Zn<sup>2+</sup> binding coordination is preserved over the course of the MD  
16 simulation of the reduce structure (**C**, opaque presentation, Cys301(S $\gamma$ )-Zn<sup>2+</sup>  $\sim$ 2.6 Å, Cys306(S $\gamma$ )-  
17 Zn<sup>2+</sup>  $\sim$ 2.8 Å, Cys645(S $\gamma$ )-Zn<sup>2+</sup>  $\sim$ 2.5 Å and Cys487(S $\gamma$ )-Zn<sup>2+</sup>  $\sim$ 2.5 Å). However, in the oxidized  
18 state, the disulfide bridges Cys301-Cys306 and Cys487-Cys645 disrupt the coordinating Zn<sup>2+</sup>  
19 binding motif, likely due to the lack of negative charge, resulting in the bridging disulfide cysteine  
20 residues pulling away from Zn<sup>2+</sup> (Cys301(S $\gamma$ )-Zn<sup>2+</sup>  $\sim$ 4.6 Å, Cys306(S $\gamma$ )-Zn<sup>2+</sup>  $\sim$ 4.1 Å, Cys645(S $\gamma$ )-  
21 Zn<sup>2+</sup>  $\sim$ 5.8 Å and Cys487(S $\gamma$ )-Zn<sup>2+</sup>  $\sim$ 6.4 Å) (**C**, transparent representation). **(D)** Charged side chains  
22 (labeled in purple) connecting the two Zn<sup>2+</sup> binding motifs. In both redox states, the charged  
23 sidechains located between the two Zn<sup>2+</sup> binding motifs (Asp303, Arg305, Glu474, Asp640,

1 Arg651) interact dynamically (**D**, residues labeled in purple), suggesting that the two  $Zn^{2+}$  binding  
2 motifs may communicate with each other through the helices based on these electrostatic  
3 interactions. (**E**) The root-mean-square deviation (RMSD (Å)) of nsp12 in WT RdRp is compared  
4 for reducing conditions (purple) versus oxidizing conditions (green) over 200 ns MD simulation.  
5 In the apo form (no RNA substrate), WT RdRp in the reduced state demonstrates overall more  
6 conserved behavior with smaller RMSD of atomic positions than WT in the oxidized state, and the  
7 side chains and backbone are more tightly clustered in the reduced state. (**F**) S647(N)- $Zn^{2+}$  distance  
8 (Å) for reduced WT (purple) versus oxidized WT (green). Residue Ser647 is located closer to  $Zn^{2+}$   
9 ( $Zn^{2+}$ -S647 N distance  $\sim 6$  Å) in the oxidized state (**F**, green line), but under reducing conditions,  
10 the peptide backbone shifts away ( $Zn^{2+}$ -S647 N distance  $\sim 7$  Å) (**F**, purple line) suggesting that the  
11 nsp12 environment near the 647 site is critical in altering nsp12 structural behavior. (**G**)  
12 Comparison of dynamic behavior of reduced WT (purple), oxidized WT (green), and reduced WT  
13 (cyan) with RNA. Simulation of WT RdRp (under reduced conditions) with RNA substrate shows  
14 more compact protein structural relationships (cyan curve), which is distinct from the more  
15 dynamic structures of the oxidized conditions (green curve). (**H**) Time lapse (20 snapshots taken  
16 over 200 ns) depictions of S647I mutation of RdRp under reducing conditions. (**I**) Comparison of  
17  $Zn^{2+}$  binding motifs for at  $t=0$ ns (left) and  $t=200$ ns (right) for WT (opaque) and S647I (transparent).  
18 The residues in S647I in  $t=200$ ns are labeled in purple. MD simulations of the S647I mutation  
19 show that substitution of Ser647 with Ile disrupts the hydrogen bonding interaction of WT Ser647-  
20  $O\gamma$  with the amide nitrogen of Ser649. (**J**) Comparison of 647( $O\gamma/C\gamma$ )-649(N) distance (Å) for WT  
21 (purple) and S647I (green). S647I mutation has larger 647( $C\gamma$ )-649(N) distance. (**K**) The RMSD  
22 of WT nsp12 (purple) and S647I nsp12 are compared over 200 ns MD simulation. Local nsp12  
23 backbone, particularly for residues 400-700, is less constrained in S647I and can explore a larger

1 conformational space while retaining its native function (average RMSD 2.45Å for S647I (green)  
2 vs. 2.19Å for WT (purple)). **(L)** Time lapse (20 snapshots taken over 200 ns) depictions of L638F  
3 mutation of RdRp under reducing conditions. **(M)** Comparison of  $Zn^{2+}$  binding motifs for at t=0ns  
4 (left) and t=200ns (right) for WT (opaque) and L638F (transparent). L638F, resulting in the bulky  
5 Phe638 sidechain, causes the nearby nsp12 backbone to shift relative to WT Leu638. **(N)**  
6 Comparison of L638/F638( $C\gamma$ )-Ala690( $C\beta$ ) distance (Å) for WT (purple) and L638F (green).  
7 L638F has an increase in the distance between Phe638( $C\gamma$ ) and Ala690( $C\beta$ ) that is on the nearby  
8 helix. **(O)** Comparison of Leu576(O)-Ala580(N) distance (Å) for WT (purple) and L638F (green).  
9 L638F has a decrease of the distance between Leu576(O) and Ala580(N) that are on the nearby  
10 helix. **(P)** The RMSD of WT nsp12 (purple) and L638F nsp12 are compared over 200 ns MD  
11 simulation. The RMSD (Å) values of nsp12 backbone atoms of residues 350-400 reflect an  
12 increase in conformational flexibility for L638F compared to WT. Taken together, the mutations  
13 in the  $Zn^{2+}$  covariant fitness cluster preserves the overall native structural integrity of the nsp  
14 subunits while simultaneously increasing conformational freedom to improve RdRp fitness as  
15 indicated by the GPR fitness score, providing a mechanistic interpretation to evolutionary role in  
16 the pandemic (**Fig. 2D** and **2E**).

Figure S5

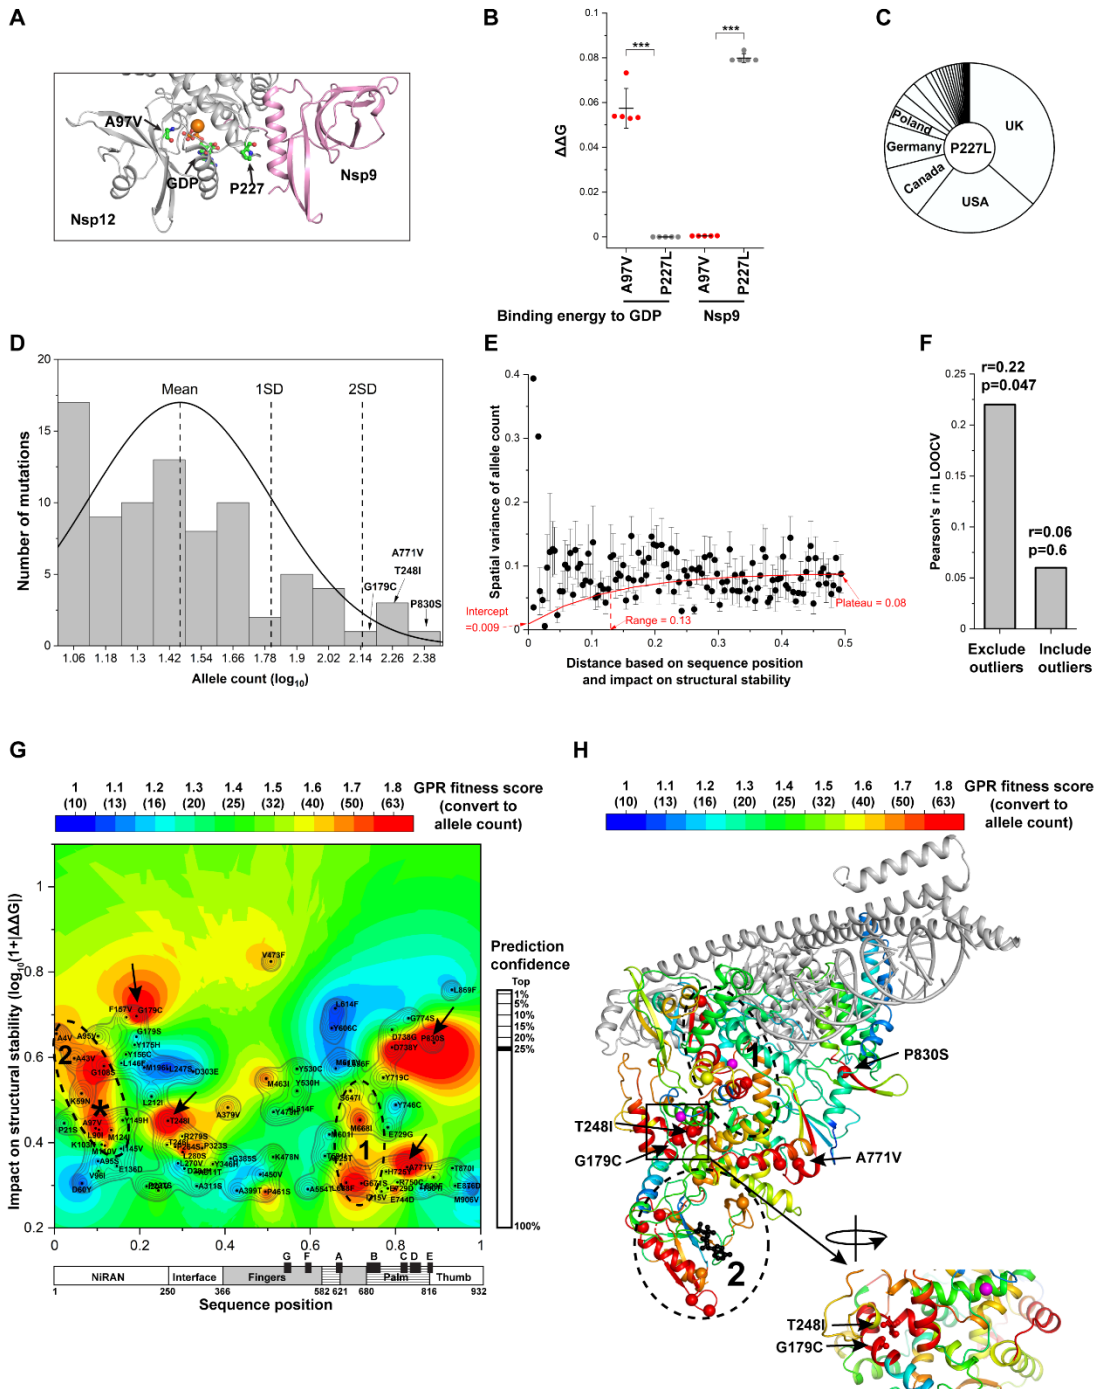

- 1 **Figure S5. GPR model for nsp12 mutations found in the Alpha VOC.** (A) P227 is located in
- 2 the interface between NiRAN domain of nsp12 and nsp9. (B) P227L shows significant
- 3 destabilizing signal for the binding energy to nsp9 when compared with A97V (Student's t-test).

1 (C) Country distribution of P227L. (D) Mutations that have significant stabilizing  
2 ( $\Delta\Delta G > 0.92$  kcal/mol) or destabilizing ( $\Delta\Delta G < -0.92$  kcal/mol) impact with above ten allele counts  
3 are used to define the structural evolution of nsp12 in the Alpha VOC. G179C, T248I, A771V and  
4 P830S have allele counts that are above two standard deviations and are considered as ‘outlier  
5 mutations’ below. (E) Variogram analysis of the mutations excluding the outlier mutations G179C,  
6 T248I, A771V and P830S that are above two standard deviations. (F) Leave-one-out cross-  
7 validation of the GPR model with or without the outlier mutations. The GPR model excluding the  
8 outlier mutations achieves significant cross-validation results while the GPR models including the  
9 outliers do not, indicating that the outlier mutations are not clustered with other mutations with  
10 high GPR fitness scores. We used the GPR model excluding the outlier mutations in the main **Fig.**  
11 **3C** to better illustrate the clustering effect of the mutations that drive the covariant fitness clusters.  
12 (G) GPR fitness landscape including the outlier mutations that are above two standard deviations  
13 (G179C, T248I, A771V and P830S). Consistent with the GPR model excluding the outlier  
14 mutations (**Fig. 3C**), we also observe covariant fitness cluster 1 and 2 in the fitness landscape  
15 including the outlier mutations. In addition, we observe that the four outlier mutations give high  
16 fitness scores to the regions surrounding them (**G**, black arrows). (H) Structural mapping the  
17 fitness landscape including the outlier mutations that are above two standard deviations. P830S is  
18 located isolated near RNA binding site. A771V is located at the connection region between  
19 cluster 1 and cluster 2. G179C and T248I are located on an interacting residue pair G179-T248,  
20 suggesting a critical residue-residue interaction in nsp12 for the fitness of the Alpha VOC.

Figure S6

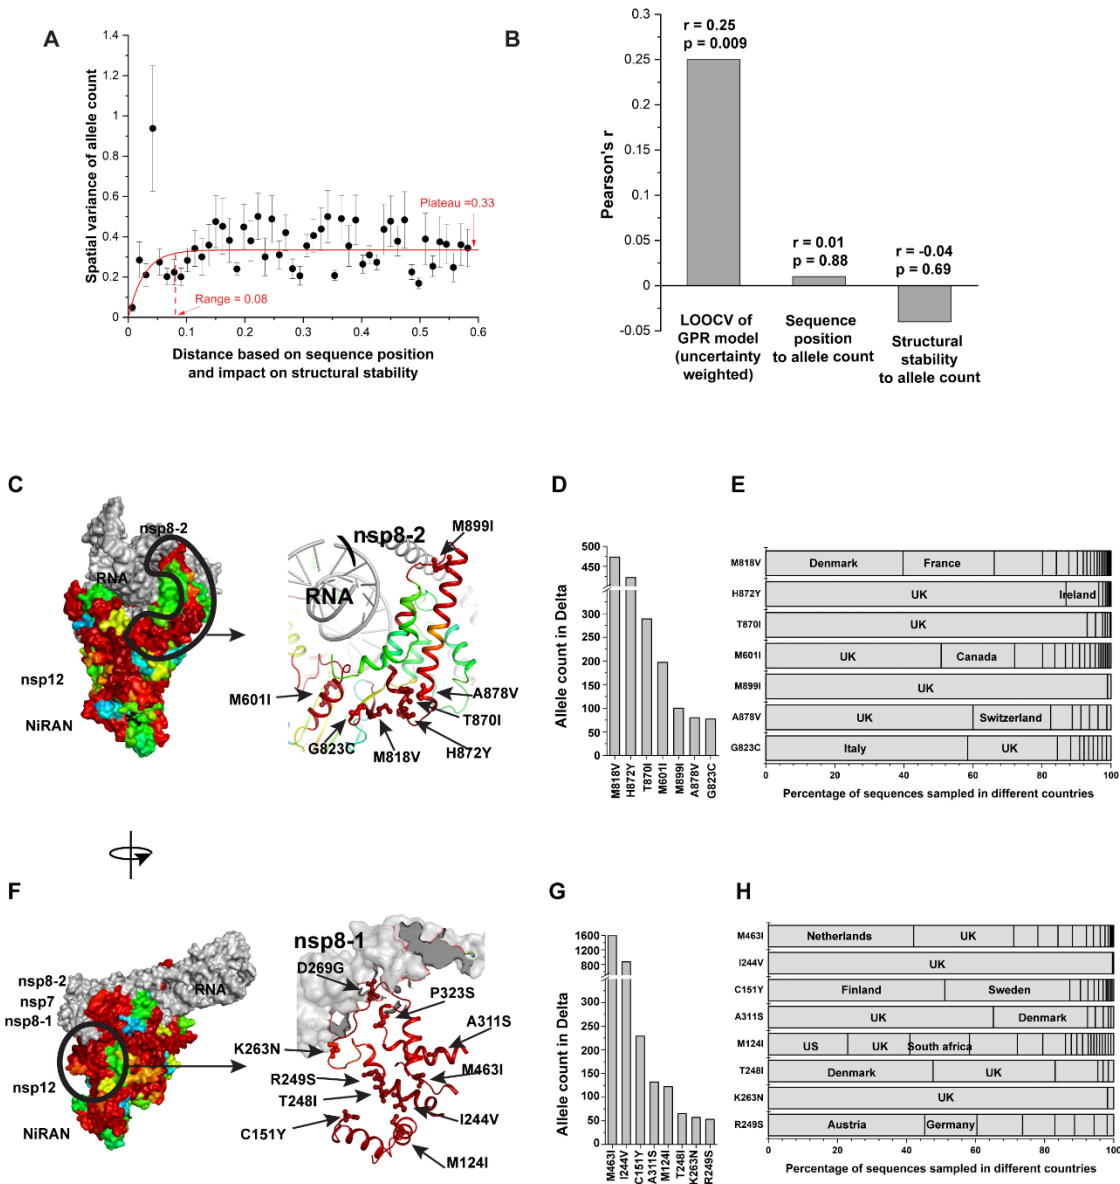

- 1 **Figure S6. GPR model for nsp12 mutations found in the Delta VOC. (A)** Variogram analysis
- 2 of nsp12 mutations in Delta VOC that that have significant stabilizing ( $\Delta\Delta G > 0.92$  kcal/mol) or
- 3 destabilizing ( $\Delta\Delta G < -0.92$  kcal/mol) impact with above ten allele counts. **(C)** Leave-one-out cross-
- 4 validation for the GPR model shown in **Fig. 4E**. Using the uncertainty generated from GPR model
- 5 as weight (the weight is calculated as:  $\omega = 1/\sigma^2$ , where  $\sigma^2$  is the GPR variance, see **Method**), the
- 6 cross-validation yields Pearson's  $r = 0.25$  between actual allele count and predicted allele count

1 with  $p = 0.009$  (null hypothesis of  $r = 0$ ; ANOVA test). There is no significant correlation between  
2 sequence position and allele count (Pearson's  $r = 0.01$ ,  $p = 0.88$ ) or between mutation impact on  
3 protein stability and allele count (Pearson's  $r = -0.04$ ,  $p = 0.69$ ), suggesting that there is additional  
4 relationship captured by GPR to generate the significant prediction for allele count **(B)**. **(C-E)**  
5 Extension of the covariant fitness cluster of C487-H642-C645-C646  $Zn^{2+}$  binding motif to the  
6 binding site between nsp12 and RNA/nsp8-2. The allele count and country distribution for each  
7 mutation are presented. The most frequent mutations in this region, M818V and H872Y are an  
8 interacting residue-residue pair (8 Å between  $C_{\alpha}$  atoms). Whereas M818V evolved in Denmark  
9 and France, H872Y was largely circulating in the population of UK and Ireland. These results  
10 highlight that a similar structural feature adjustment can evolved independently in different  
11 countries to achieve improved fitness. **(F-H)** Residues with high GPR fitness scores linking  
12 NiRAN domain to the binding interface between nsp12 and nsp8-1. The allele count and country  
13 distribution for each mutation are presented. The two most frequent mutations in this region,  
14 M463I and I244V are within 8 Å separation of the C-alpha atoms. Interestingly, they show  
15 differential impact in different countries (Netherlands for M463I; UK for I244V), likely reflecting  
16 population specific features impacting the dynamics of spread.

17
